# Supplementary material for: Machine learning-assisted data-driven optimization and understanding of the multiple stage process for extraction of polysaccharides and secondary metabolites from natural products
Source: Royal Society of Chemistry journal article supplement (doi:10.1039/d2gc04574e), 2023-01-01
Supplement: d2gc04574e1.pdf [file d2gc04574e1.pdf]

## Electronic Supplementary material

### **Computational and data driven-assisted optimizing and understanding of the multiple stage extraction process for polysaccharide and secondary metabolites from natural products**

Jiamu Ma<sup>a</sup>, Jianling Yao<sup>a</sup>, Xueyang Ren<sup>a</sup>, Ying Dong<sup>a</sup>, Ruolan Song<sup>a</sup>, Xiangjian Zhong<sup>a</sup>, Yuan Zheng<sup>a</sup>, Dongjie Shan <sup>a</sup>, Fang Lv <sup>a</sup>, Xianxian Li <sup>a</sup>, Qingyue Deng <sup>a</sup>, Yingyu He <sup>a</sup>, Ruijuan Yuan<sup>\*a</sup>, and Gaimei She<sup>\*a</sup>

*School of Chinese Meteria Medica, Beijing University of Chinese Medicine, Fangshan District, 100029 Beijing, China*

\*Corresponding author. Tel.: +86-10-5391-2129; Fax: +86-10-5391-2129; E-Mail: rjyuance@126.com; shegaimei@126.com.

## Table of Contents

|                                                                                                               |    |
|---------------------------------------------------------------------------------------------------------------|----|
| 1. General.....                                                                                               | 3  |
| 1.1 List of Figures .....                                                                                     | 3  |
| 1.2 List of Tables.....                                                                                       | 3  |
| 2. Materials and methods .....                                                                                | 4  |
| 2.1 Measurement and data processing method of panoramic characterization parameters .....                     | 4  |
| 2.2 qNMR analysis procedures .....                                                                            | 4  |
| 2.3 HPLC fingerprint analysis.....                                                                            | 5  |
| 2.4 Molecular weight of polysaccharides.....                                                                  | 5  |
| 2.5 Content determination of specific parameters in OED.....                                                  | 6  |
| 2.6 Determination of components composition of ideal extracts of BWG by UHPLC-Q-Orbitrap-MS/MS analysis ..... | 6  |
| 2.7 Monosaccharide composition of polysaccharide of the ideal extraction.....                                 | 7  |
| 3. Results and discussion .....                                                                               | 7  |
| 3.1 OED results and the identification of OED extraction process .....                                        | 7  |
| 3.2 qNMR analysis for OED.....                                                                                | 9  |
| 3.3 HPLC fingerprint analysis for OED.....                                                                    | 10 |
| 3.4 Molecular weight of polysaccharides analysis for OED .....                                                | 12 |
| 4. References.....                                                                                            | 60 |

# 1. General

## 1.1 List of Figures

Fig. S1 Basic information about qNMR analysis.

Fig. S2 HPLC fingerprint schematic diagram of OED. 29 peaks in same were marked.

Fig. S3 Statistical inference of qNMR and HPLC fingerprint based on chemometrics.

Fig. S4 Chromatogram of molecular weight.

Fig. S5. Concentrations of OED samples calculated by MCR-ALS.

Fig. S6. qNMR spectrum of OED samples deconvoluted by MCR-ALS. by MCR-ALS.

Fig. S7. Total ion chromatogram of ideal extract of BWG on positive and negative mode.

Fig. S8. The workflow of the model to optimize the multiple stage extraction process.

## 1.2 List of Tables

Table S1 OED results of the ethanol extraction process of the influencing factors.

Table S2 OED results of the water extraction process of the influencing factors.

Table S3. Visual table of OED test in EE process

Table S4. Analysis of variance table of OED test in EE process

Table S5. Visual table of OED test in WE process

Table S6. Analysis of variance table of OED test in WE process

Table S7. Same important peaks identification from qNMR in this study.

Table S8. Same peaks identification from HPLC fingerprint analysis in this study.

Table S9. Same peaks identification from MW analysis in this study.

Table S10. Components identified in ideal extracts of BSG.

Table S11. Regression model performance of training data and validation data.

## 2. Materials and methods

### 2.1 Measurement and data processing method of panoramic characterization parameters

As the WE process is much more commonly applied in TCM extraction, as well as there are four kinds of materials that take part in the WE process when there is only one material in the EE process, a set of panoramic characterization parameters (qNMR, HPLC fingerprint, and molecular weight of polysaccharide) would explore the changing during the extraction process.

### 2.2 qNMR analysis procedures

A 2.5 mg BSG was accurately weighed and dissolved in 500  $\mu\text{L}$  of  $\text{D}_2\text{O}$  containing 0.01 mM/mL of DSS- $d_6$  for the qNMR sample<sup>1,2</sup>. Then the mixed solution was transferred to a 5-mm NMR tube for subsequent analysis. The  $^1\text{H}$  NMR was performed by a Bruker Avance 400 MHz NMR spectrometer. The  $^1\text{H}$  NMR spectrum acquisition parameters were set as default.

The NMR spectra were processed by Bruker Topspin (Bruker Biospin Corp. Billerica, MA, USA) and MestReNova software (Mestrelab Research, Santiago de Compostela, Spain). The peak of DSS- $d_6$  was auto-corrected to 0.00 ppm as an internal reference. The embedded modules in Topspin were used to achieve phase correction manually. MestReNova was then used to conduct baseline correction with the Bernstein Polynomial Fit algorithm. The raw spectrum data was handled by binning ( $\delta=0.01$  ppm) for dimensionality reduction.

Many peaks have similar chemical shifts ( $\delta$ , ppm), and overlapped could cause a dilemma like uncertainty quantitative. Therefore, multivariate curve resolution-alternating least squares (MCR-ALS), as a powerful mathematic method, was introduced for recovering the pure NMR spectrum and the corresponding concentration according to the chemical shift<sup>3</sup>. Principal components analysis (PCA), hierarchical cluster analysis (HCA), and partial least squares discriminant analysis (PLS-DA) were applied in the extracted peaks from MCR-ALS for classifying the peaks with a great contribution to the extraction process. For calculating and predicting the extraction process furtherly, the average mass concentration was brought up based on the whole NMR spectrum. Herein, the following equations were presented for describing OED samples:

$$W_x = \frac{A_x E_x}{A_s E_s} W_s \quad (\text{S1})$$

Where  $W_x$  and  $W_s$  are the mass concentrations of components and internal standard,  $A_x$  and  $A_s$  are the integral areas for characteristic peaks of components and methyl groups of internal standard, and  $E_x$  and  $E_s$  are the ratios of molar masses to the numbers from the protons, respectively.

$$W_{ave} = W_s \times \sum \frac{W_x}{W_T} \quad (\text{S2})$$

Where  $W_{ave}$  denotes the meaning of average mass concentration, while  $W_T$  is the total peak area of all peaks with the chemical shift from 0.5~10.0 ppm.

### 2.3 HPLC fingerprint analysis

Samples from the WE process of OED were prepared for high-performance liquid chromatography (HPLC) fingerprint analysis. Analyses were performed using a S6000 series HPLC equipment coupled to a PAD detector (Acchorom Tech, China). Compound separation was performed using an Agilent XDB C<sub>18</sub> column (4.6mm×250mm, 5 μm). The column temperature was set at 30°C. The mobile phases were composed of 0.1 % formic acid in water (solvent A) and acetonitrile (solvent B). The applied gradient was as follows: 0-5 min, 5% A; 5-20 min, 5-10% A; 20-40 min, 10-20% A; 40-55 min, 20-25% A; 55-70 min, 25-30% A; 70-80 min, 30-40% A; 80-85 min, 40-50% A; 85-95 min, 50-60% A; 95-115 min, 60-90% A; 115-120 min, 90%A. The flow velocity and injection volume were 1.0 mL/min and 10 μL. The UV spectra was set at 254 nm due to the maximum number of peaks of samples. The HPLC data files of OED with the suffix of “AIA” were introduced into the Similarity evaluation system for the chromatographic fingerprint of TCM (Version 2012 A) to generate fingerprint chromatographic and identity common peaks. All sets were as default.

Peak area of same peaks as data input to conducted analysis algorithm based on PCA, HCA, and support vector machine (SVM) for clustering. Furthermore, PLS-DA was performed to identify the variable importance for the projection (VIP) peaks and spotting the key components that had a vital influence to sample.

As the clustering results and picked VIP peaks, the average of the area of VIP components was put up as following equation (3) ~ (4). Since the loss of standards and qualitative properties,  $A_{ave}$  is taken logarithm as normalization.

$$A_{ave} = A_T \times \sum_{n=1}^8 \frac{A_n}{A_T} \quad (S3)$$

$$\overline{A_{ave}} = \log_{10}(A_{ave}) \quad (S4)$$

Where  $A_{ave}$  denotes the average peak area of each OED sample,  $A_n$  means the peak area of VIP peaks in each sample, and  $A_T$  means the total area of the same peaks in each OED sample.  $\overline{A_{ave}}$  means the standardized average peak area of each sample.

### 2.4 Molecular weight of polysaccharides

Samples to be tested were as same as that in qNMR and HPLC fingerprint. The molecular weight of samples was detected by the HPGPC method on the HPLC (2695, Waters Technology, USA) with an evaporative light-scattering detector (2424, Waters Technology, USA). The sample and standard at a concentration of 5 mg/mL and 1 mg/mL were accurately prepared. TSKgel PWXL 6000 (7.8 mm I.D. × 30 cm, TOSHO, Japan) and TSKgel PWXL 4000 (7.8 mm I.D. × 30 cm, TOSHO, Japan) were equipped for detection. Ultrapure water was used as the mobile phase at a flow rate of 0.5 mL/min. The column temperature was maintained at 30°C. The injection volume was 20 μL. The weight-average (M<sub>w</sub>) molecular weight of each peak was determined by retention time (RT) according to the standard curves. The width of each peak, showing the

duration of the peak, and the number of peaks was also the features in evaluating the  $M_w$  of polysaccharides. To bridge to differences among all OED experiments and to represent the features more specific, average molecular weight ( $M_{wave}$ ) was adopted. The equation to calculate  $M_{wave}$  could be expressed as below:

$$\alpha_n = \frac{A_n}{A_T} \quad (S5)$$

$$M_{wave} = \sum_{n=1}^4 \alpha_n A_n \quad (S6)$$

$$\overline{M_{wave}} = \log_{10}(M_{wave}) \quad (S7)$$

Where  $\alpha_n$  denotes the meaning of the proportion of total peak area accounted for every single peak,  $A_n$  is the peak area of a single peak, and  $A_T$  refers to the total peak area of all same peaks in OED samples.  $M_{wave}$  has the meaning of average molecular weight of polysaccharides in each OED sample, while  $\overline{M_{wave}}$  is the standardized form of  $M_{wave}$ .

## 2.5 Content determination of specific parameters in OED

Content of schisandrin and hesperidin were determined by the methods from their original plant recorded by the Chinese Pharmacopoeia 2020 Edition and performed on HPLC (S6000, Acchrom, China). The yield of dry extract was determined under General Provisions 2201 of the Chinese Pharmacopoeia 2020 Edition, either.

Total sugar content was measured using the slightly modified phenol sulfuric acid method. Extract samples to be tested (0.1 g) were homogenized in 10 mL of distilled water. The mixture was dropped into ultrasonic for 30 min. 0.24 mL filtrate was mixed with 1.26 mL 95% ethyl alcohol for precipitating total sugar. While waiting for 8 h, the mixture was centrifuged at 7000 r/min for 20 min. Then, the part of the solid was dissolved in 5 mL water as a sample for the test. The 2 mL sample was mixed with 1.2 mL 5% phenol and 5.5 mL concentrated sulfuric acid, and the reaction was performed under 90°C water bathing for 15 min. The cool solution was detected for absorbance under 485 nm. All measurements were conducted in triple unless was mentioned specially.

## 2.6 Determination of components composition of ideal extracts of BWG by UHPLC-Q-Orbitrap-MS/MS analysis

The composition of small molecule compound of BWG was analyzed by an Ultimate 3000 system (Dionex Corp., USA) which was series with Thermo Q Exactive Plus QE (Thermo Fisher Scientific Corp., USA). Data analysis was performed on Compound Discovery 3.2 (Thermo Fisher Scientific Corp., USA). Liquid chromatography analysis was achieved with Agilent ZORBAX Eclipse XDB C<sub>18</sub> column (250×4.6mm, 5μm). The mobile phases consisted of 0.1% formic acid water (A) and acetonitrile (B) with the gradient elution of 5% B at 0-5 min, 5%-10% B at 5-10 min, 10%-20% B at 10-40 min, 20-25% B at 40-45 min, 25%-30% B at 45-55 min, 30%-45% B at 55-67 min, 45%-50% B at 67-70 min, 50% B at 70-75 min, 50%-60% B at 75-85

min, 60%-75% B at 85-93 min, 75%-90% B at 93-105 min, 90% B at 105-110 min, 90% -5% B at 110-110.1 min, 5% B at 110.1-120 min. The column temperature was 35°C. The flow rate was maintained at 1.0 mL/min, and the injection volume was 5  $\mu$ L. The acquisition of high-resolution mass spectra was conducted in the positive and negative ion modes. Optimized ionization conditions were as follows: sheath gas flow, 40 L/min; capillary voltage, 3000 V; gas temperature, 320°C; the analysis was carried out using a scan of 75 to 1125 m/z.

## 2.7 Monosaccharide composition of polysaccharide of the ideal extraction

Monosaccharide composition was determined following PMP derivatization using reverse HPLC<sup>4,5</sup>. In brief, 200  $\mu$ L 5 mg/mL BWGP solution and 4.0 M TFA solution were mixed, then were hydrolyzed at 110°C for 120 min. After cooling, 400  $\mu$ L methanol was added and blown with N<sub>2</sub> to completely remove the excess TFA. The residue was re-dissolved in a mixture of 300  $\mu$ L solution with isometric of 0.3 M NaOH solution and PMP-methanol solution. Before 100  $\mu$ L HCl being added, the mixed solution system was at derivatization reaction at 70°C for 60 min. Then the water was added to 3 mL, and equal volume of chloroform was added either for removing the impurities in the water layer. This process was repeated three times, and filtered with a 0.22  $\mu$ m membrane as sample to be tested. The sample was analyzed by the same instrumentation and column of HPLC fingerprint analysis. The mobile phase was a mixture of 0.1 M phosphate buffer and acetonitrile (83:17, at pH 6.8), while the flow rate and injection volume were 1.0 mL/min and 10  $\mu$ L. Standards monosaccharides were processed by using the same method. The content of each monosaccharide in extracts was determined by the calibration curve.

## 3. Results and discussion

### 3.1 OED results and the identification of OED extraction process

The simulation conditions based on L<sub>9</sub>(3<sup>4</sup>) OED of ethanol and water extraction process and also other orthogonal test results are shown in Table S3 – S6. Each row in the table were tested twice, therefore there were 18 sets of raw data for simulating with the help of further analysis. Value of observations in detail is shown in Table S1, Table S2.

**Table S1** OED results of the ethanol extraction process of the influencing factors.

| Case | Yield of Dry Extraction (%) | Extraction Yield of Schisandrin (%) |
|------|-----------------------------|-------------------------------------|
| 1    | 23.44 $\pm$ 0.13            | 3.81 $\pm$ 0.00                     |
| 2    | 34.30 $\pm$ 0.77            | 30.35 $\pm$ 0.36                    |
| 3    | 37.24 $\pm$ 0.25            | 36.05 $\pm$ 0.33                    |
| 4    | 28.70 $\pm$ 0.35            | 19.55 $\pm$ 0.48                    |
| 5    | 37.76 $\pm$ 0.17            | 26.84 $\pm$ 0.32                    |
| 6    | 30.05 $\pm$ 0.14            | 27.68 $\pm$ 0.08                    |
| 7    | 30.32 $\pm$ 0.09            | 30.88 $\pm$ 0.32                    |

|   |              |              |
|---|--------------|--------------|
| 8 | 25.36 ± 0.04 | 17.53 ± 0.09 |
| 9 | 31.29 ± 0.91 | 48.84 ± 0.32 |

Though the importance of view of two evaluating indexes were about to be the same, the slight difference may cause incorrect results of extraction. Taking together, the best ethanol extraction process selected in OED analysis could be summarized as: 2.0 g SC and 24 mL 50% ethanol alcohol was refluxed 2 h, this process repeated twice.

While on the water extraction process, some problems which were same as ethanol extraction process happened again. The water extraction process had more observations, it got more trouble in deciding which extraction process was better. With direct result of OED, the water extraction process was determined as following: 6.0 g AR, 3.0 g BS, 3.0 g CP and the residue of SC after ethanol extraction process was boiled with water for 1.5 hours, this process was repeated twice.

**Table S2** OED results of the water extraction process of the influencing factors.

| Case | Panoramic Characterization Parameters |                               |                                | Specific Characterization Parameters |                                        |                                       |                                          |
|------|---------------------------------------|-------------------------------|--------------------------------|--------------------------------------|----------------------------------------|---------------------------------------|------------------------------------------|
|      | Wave<br>( $\mu\text{M/mL}$ )          | $\overline{A_{ave}}$<br>(mAu) | $\overline{M_{wave}}$<br>(kDa) | Yield of<br>Dry<br>Extraction (%)    | Content<br>of Total<br>Sugar<br>(mg/g) | Content<br>of<br>Hesperidin<br>(mg/g) | Content of<br>Astragaloside IV<br>(mg/g) |
| 1    | 0.1192 ± 0.01                         | 5.79 ± 0.01                   | 4.18 ± 0.07                    | 20.39 ± 1.50                         | 8.13 ± 0.16                            | 4.23 ± 0.09                           | 0.3628 ± 0.00                            |
| 2    | 0.1703 ± 0.02                         | 5.99 ± 0.02                   | 4.01 ± 0.02                    | 26.54 ± 0.62                         | 11.20 ± 0.32                           | 6.55 ± 0.04                           | 0.5099 ± 0.00                            |
| 3    | 0.1085 ± 0.05                         | 6.19 ± 0.04                   | 3.91 ± 0.01                    | 30.05 ± 0.18                         | 11.62 ± 0.21                           | 8.37 ± 0.27                           | 0.5756 ± 0.02                            |
| 4    | 0.1364 ± 0.01                         | 6.02 ± 0.05                   | 4.06 ± 0.02                    | 22.30 ± 0.17                         | 8.99 ± 0.08                            | 4.70 ± 0.29                           | 0.5131 ± 0.09                            |
| 5    | 0.1945 ± 0.01                         | 5.95 ± 0.03                   | 3.85 ± 0.02                    | 26.82 ± 0.68                         | 9.61 ± 0.23                            | 6.56 ± 0.34                           | 0.5829 ± 0.03                            |
| 6    | 0.2205 ± 0.01                         | 6.13 ± 0.07                   | 3.79 ± 0.05                    | 26.68 ± 0.71                         | 10.99 ± 0.21                           | 9.39 ± 0.15                           | 0.6602 ± 0.04                            |
| 7    | 0.2209 ± 0.04                         | 5.95 ± 0.01                   | 3.92 ± 0.07                    | 23.62 ± 0.82                         | 5.78 ± 0.02                            | 4.74 ± 0.34                           | 0.4664 ± 0.01                            |
| 8    | 0.1696 ± 0.07                         | 5.97 ± 0.06                   | 3.61 ± 0.07                    | 25.77 ± 0.20                         | 7.03 ± 0.04                            | 5.68 ± 0.25                           | 0.6022 ± 0.03                            |
| 9    | 0.2851 ± 0.01                         | 6.02 ± 0.02                   | 3.69 ± 0.07                    | 31.93 ± 0.80                         | 10.44 ± 0.09                           | 9.25 ± 0.23                           | 0.5869 ± 0.03                            |



### 3.2 qNMR analysis for OED

To date, all studies relating to extraction process have utilized chromatographic techniques for quantification of observations like content of some key components and others with more comprehensive characteristic based on retention times. qNMR provides a brand new view for obtaining panoramic condition of sample. Whereas, compared to other spectrum method, qNMR has grown to be a significantly analytical technique of secondary metabolites and the structure of polysaccharide<sup>6,7</sup>.

The <sup>1</sup>H qNMR spectrum of raw data and dimension by binning data were shown in Fig. 4. Attributed to the dimension of binning processing, the peaks were lightful more concentrate which greatly convenient for the next data analysis. According to the chemical shift of each peak, the spectrum was divided into 3 parts which were high field area (mainly consisting organic acid and some amino acid, ranging 0.50-3.30 ppm), medium field area (mainly was the glycoside components, ranging 3.30-5.50 ppm), and low field area (mainly was the aromatic components, ranging 5.50-10.00 ppm). With the insight of the total area of 3 parts of <sup>1</sup>H NMR spectrum, the changing trend of category of components was shown. Along the extraction process, the ratio of aromatic components was almost the same, yet the ratios between glycoside components, organic acid and amino acid varied a lot. That indicated the extraction process may have noticeable influence on the components like glycoside, organic acid and amino acid, while may affect the components like aromatic little.

To figure out which peaks had close relation with the extraction process, MCR-ALS was introduced for this exploring. 32 peaks were spotted as characteristic peak in the extraction process. Their information in detail was shown in Supplementary material. Then, PCA and HCA results stand the opinion of these peaks were to separate as 3 parts, which mainly suggested their chemical shift was the incontrovertible reason for their classes. PLS-DA acquired 8 peaks as VIP peak among all 32 peaks, also they were noted in Supplementary material. There were 5 peaks coming from the area of medium field area, and 3 peaks could trace to the source of high field area. Glycoside components as well as the small molecule compounds played a vital role of clarifying the extraction process. Herein, the following experiments were to look into the extraction process.

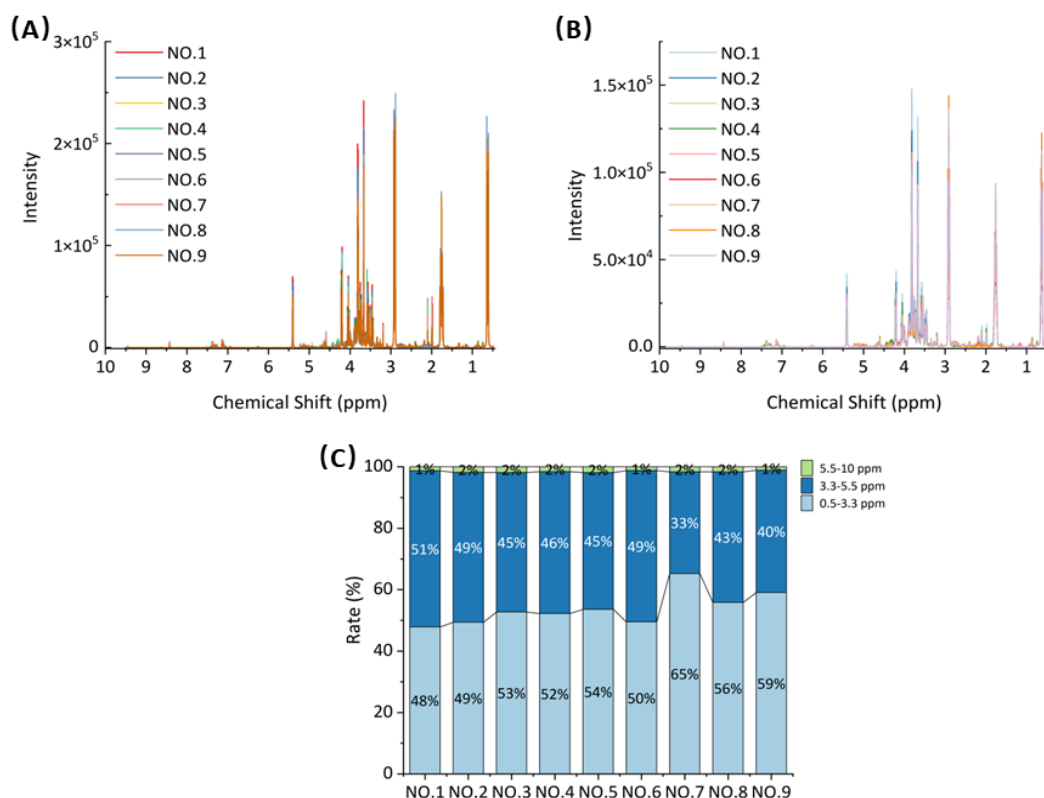

**Fig. S 1** Basic information about qNMR analysis. (A) Raw spectrum of 1H-qNMR spectrum, (B) Binning from 0.50-10.00 ppm of 1H-qNMR spectrum, (C) Radio of total peak area in various field.

### 3.3 HPLC fingerprint analysis for OED

Chromatography fingerprint map is considered to be a reasonable quality evaluation method for TCM and related products<sup>8</sup>. It can capture the slightly difference and has been a powerful methodology to highlight differences during extraction process. Considering about the complex compound composition causing by the formula and their potential interactions, a HPLC fingerprint method was established for analysis the secondary metabolites during extraction process. The HPLC chromatogram of OED samples was shown in Fig. S2. 29 peaks in common (besides the peak of solvent) were gained after basic chromatogram comparison, that were also collected for further analysis. Among which 10 peaks was identified with standards. Hesperidin was set to be the reference peak due to its moderate retention time and suitable area of peak. The HPLC fingerprint was validated by methodological examination of precision, repeatability and stability in 24 h, which had RSD of 0.37%, 2.70% and 0.56%, respectively. The similarity of all samples was within the range of 88.6%~99.5%.

For the better knowing about how the extraction process influence the secondary metabolites, PCA and HCA were conducted for the same peaks in the first place. The area of peak was taken the logarithm for eliminating the huge range of different peak. Peaks were shown gathered into 4 fuzzy groups in PCA, while there were 3 groups in HCA were clearly divided at the same time. SVM is a kind of machine learning algorithm with ability of using a small number of samples for prediction without feature extraction<sup>9</sup>. Therefore, PCA-SVM was introduced for better highlight

in clustering the peaks. 95% of classification accuracy was shown in the model of PCA-SVM, while all peaks were divided into 5 parts (Fig. S3). Yet it was still hard for understanding which components or which classification group was more likely impacted by the extraction process with the inefficient cluster in PCA-SVM. The results showed that all peaks could be analyzed by three main components, which accounted for 96.14% of the total variance. PLS-DA was severed for investigating the key peak by VIP value, which 11 peaks in total were characterized. Peak 19, peak 8 (calycosin-7-glucoside), peak 14 (militarine), peak 5 (ferulic acid), peak 3, peak 10 (tangeretin), peak 11 (hesperidin), peak 1, peak 23, peak 9, and peak 6 were selected to be VIP component in analysis. As the retention time from peak 1 to peak 4 were above 4 min, that may be disturbed by various factors and being erratic, therefore they were all get rid of further analysis.

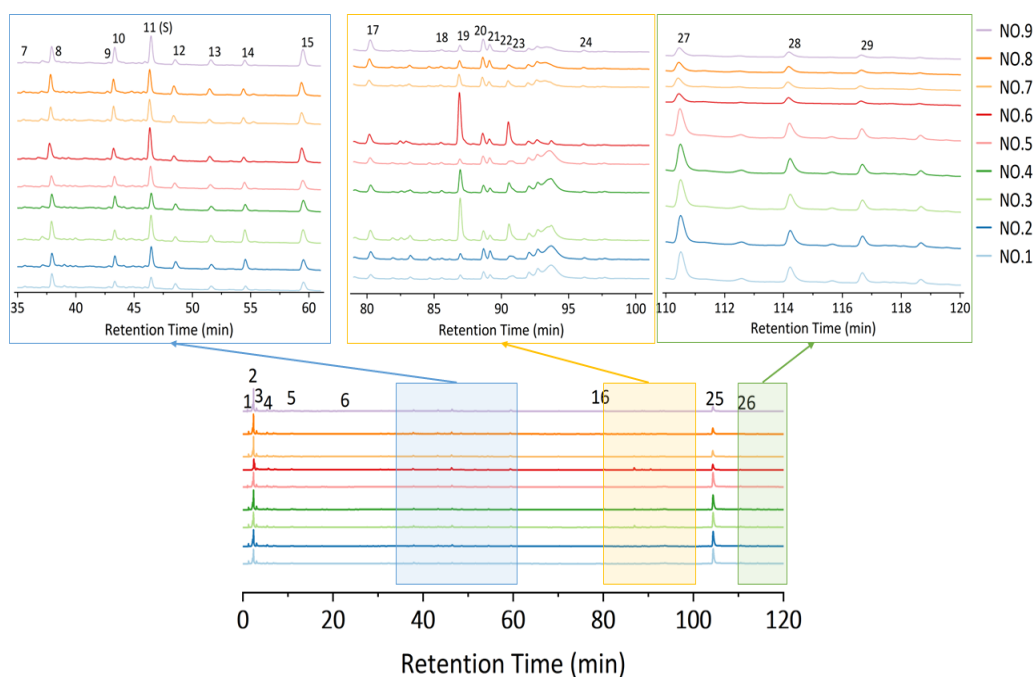

**Fig. S 2** HPLC fingerprint schematic diagram of OED. 29 peaks in same were marked.

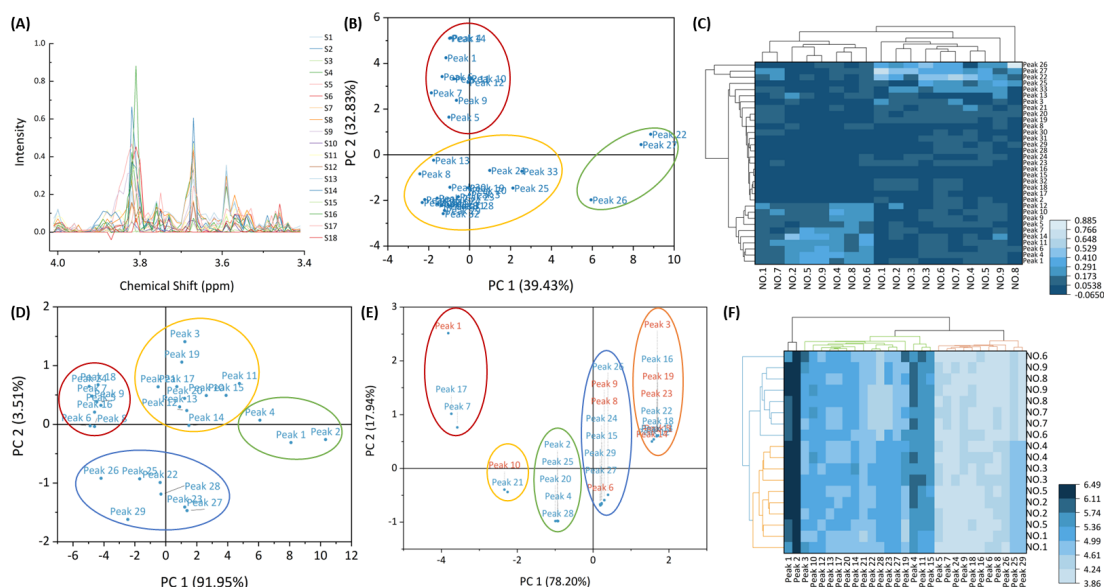

**Fig. S 3** Statistical inference of qNMR and HPLC fingerprint based on chemometrics. (A) MCR-ALS resolved spectral profiles of qNMR (3.40-4.00 ppm), (B) PCA of characteristic peak from qNMR, (C) HCA of qNMR, (D) PCA of same peaks from HPLC fingerprint, (E) PCA-SVM of same peaks from HPLC fingerprint based on a Gaussian Kernel, VIP peak was marked as red, (F) HCA of HPLC fingerprint.

### 3.4 Molecular weight of polysaccharides analysis for OED

$M_w$  is an indispensable factor in the study of the structure-function relationship of polysaccharides, also is an important parameter for emulsifying and rheological properties that influencing digestion and absorption in the body a lot<sup>10-12</sup>. Here, the symbol results of each OED experiment were shown in Fig. S4. It was obvious that extraction influenced a lot in  $M_w$  of polysaccharide, the data about  $M_w$  of each peak and their duration time in detail was shown in Table.S9. As the figure showing, way of peak being different with other samples could be diverse. There were 5 main peaks in all samples, yet they may be slightly splitting accompany with extraction process. In all, the  $M_w$  had trend in being small when the trend of fully extraction performance happened, showing the way was that the retention time of peak was delayed. According to the result shown in Fig.8, BWGP showed heterogeneous structures since there were several elution peaks following elution. As shown in figure, BWGP had 5 peaks, and the mean  $M_w$  was 36.35~1301.98 kDa, while peak 1, peak 5 were out of the range of standard linear regression equation. On the other words,  $M_w$  of peak 1 was greater than 2457 kDa,  $M_w$  of peak 5 were less than 12.6 kDa. Polysaccharide with smaller molecular weights has remarkable

bioactivities than the one with larger polysaccharides<sup>13</sup>. It is thought to contribute to smaller polysaccharides pass through biological membranes more easily, and also can more efficiently exert effects without inciting immune stress<sup>14</sup>.

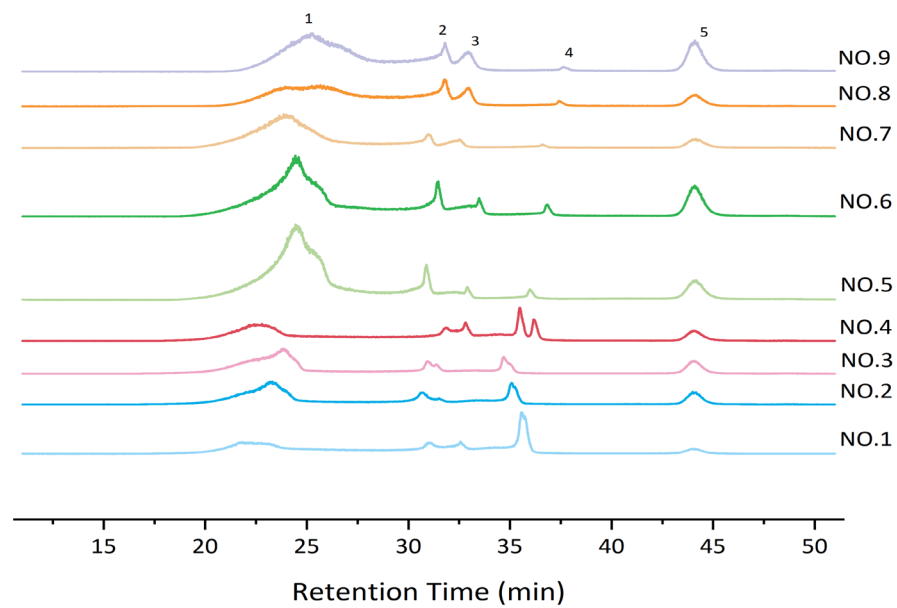

**Fig. S 4** Chromatogram of molecular weight.

---

**Table S3.** Visual table of OED test in EE process

| Experiment number               | A     | B     | C     | D      | Yield of Dry Extraction (%) | Extraction Yield of Schisandrin (%) |
|---------------------------------|-------|-------|-------|--------|-----------------------------|-------------------------------------|
| 1                               | 1     | 1     | 1     | 1      | 23.44                       | 3.81                                |
| 2                               | 1     | 2     | 2     | 2      | 34.30                       | 30.35                               |
| 3                               | 1     | 3     | 3     | 3      | 37.24                       | 36.05                               |
| 4                               | 2     | 1     | 2     | 3      | 28.70                       | 19.55                               |
| 5                               | 2     | 2     | 3     | 1      | 37.76                       | 26.84                               |
| 6                               | 2     | 3     | 1     | 2      | 30.05                       | 27.68                               |
| 7                               | 3     | 1     | 3     | 2      | 30.32                       | 30.88                               |
| 8                               | 3     | 2     | 1     | 3      | 25.36                       | 17.53                               |
| 9                               | 3     | 3     | 2     | 1      | 31.29                       | 48.84                               |
| Yield of Dry Extraction         | $K_1$ | 94.98 | 82.46 | 78.85  | 92.49                       |                                     |
|                                 | $K_2$ | 96.51 | 97.42 | 94.29  | 94.67                       |                                     |
|                                 | $K_3$ | 86.97 | 98.58 | 105.32 | 91.3                        |                                     |
|                                 | $R$   | 9.54  | 16.12 | 26.47  | 3.37                        |                                     |
| Extraction Yield of Schisandrin | $K_1$ | 70.21 | 54.24 | 49.02  | 79.49                       |                                     |

---

|       |       |        |       |       |
|-------|-------|--------|-------|-------|
| $K_2$ | 74.07 | 74.72  | 98.74 | 88.91 |
| $K_3$ | 97.25 | 112.57 | 93.77 | 73.13 |
| $R$   | 27.04 | 58.33  | 49.72 | 15.78 |

---

**Table S4.** Analysis of variance table of OED test in EE process

| Observation                     | Source of Variance | Sum of Squared Deviations | Degrees of Freedom | F Ratio  | F-Critical Value | Significance |
|---------------------------------|--------------------|---------------------------|--------------------|----------|------------------|--------------|
| Yield of Dry Extraction         | A                  | 107.747                   | 2                  | 289.117  | 19.00            | $p < 0.01$   |
|                                 | B                  | 235.705                   | 2                  | 632.463  | 19.00            | $p < 0.01$   |
|                                 | C                  | 3.882                     | 2                  | 10.417   | 19.00            | $p < 0.01$   |
|                                 | D                  | 34.988                    | 2                  | 93.884   | 19.00            | $p < 0.01$   |
| Extraction Yield of Schisandrin | A                  | 1167.654                  | 2                  | 6644.884 | 19.00            | $p < 0.01$   |
|                                 | B                  | 999.522                   | 2                  | 5688.081 | 19.00            | $p < 0.01$   |
|                                 | C                  | 84.106                    | 2                  | 478.631  | 19.00            | $p < 0.01$   |
|                                 | D                  | 285.168                   | 2                  | 1622.836 | 19.00            | $p < 0.01$   |



**Table S5.** Visual table of OED test in WE process

| Experiments Number      | A              | B          | C          | D          | Yield of Dry Extraction (%) | Content of Total Sugar (mg/g) | Content of Hesperidin (mg/g) | Content of Astragaloside IV (mg/g) | $W_{ave}$ ( $\mu\text{M}/\text{mL}$ ) | $\overline{A_{ave}}$ (mA u) | $\overline{M_{wave}}$ (kDa) |
|-------------------------|----------------|------------|------------|------------|-----------------------------|-------------------------------|------------------------------|------------------------------------|---------------------------------------|-----------------------------|-----------------------------|
| 1                       | 1:10           | 1          | 1          | 1          | 20.39                       | 8.125                         | 4.2295                       | 0.3628                             |                                       |                             |                             |
| 2                       | 1:10           | 2          | 1.5        | 2          | 26.54                       | 11.195                        | 6.5521                       | 0.5099                             |                                       |                             |                             |
| 3                       | 1:10           | 3          | 2          | 3          | 30.05                       | 11.620                        | 8.3655                       | 0.5756                             |                                       |                             |                             |
| 4                       | 1:12           | 1          | 1.5        | 3          | 22.30                       | 8.995                         | 4.6957                       | 0.5131                             |                                       |                             |                             |
| 5                       | 1:12           | 2          | 2          | 1          | 26.82                       | 9.610                         | 6.5636                       | 0.5829                             |                                       |                             |                             |
| 6                       | 1:12           | 3          | 1          | 2          | 26.68                       | 10.99                         | 9.3949                       | 0.6602                             |                                       |                             |                             |
| 7                       | 1:14           | 1          | 2          | 2          | 23.62                       | 5.775                         | 4.7400                       | 0.4664                             |                                       |                             |                             |
| 8                       | 1:14           | 2          | 1          | 3          | 25.77                       | 7.025                         | 5.6836                       | 0.6022                             |                                       |                             |                             |
| 9                       | 1:14           | 3          | 1.5        | 1          | 31.93                       | 10.435                        | 9.2457                       | 0.5869                             |                                       |                             |                             |
| Yield of Dry Extraction | K <sub>1</sub> | 76.98      | 66.31      | 72.84      | 79.14                       |                               |                              |                                    |                                       |                             |                             |
|                         | K <sub>2</sub> | 75.80      | 79.13      | 80.77      | 76.84                       |                               |                              |                                    |                                       |                             |                             |
|                         | K <sub>3</sub> | 81.32      | 88.66      | 80.49      | 78.12                       |                               |                              |                                    |                                       |                             |                             |
|                         | R              | 5.52       | 22.35      | 7.93       | 2.30                        |                               |                              |                                    |                                       |                             |                             |
| Content of Total Sugar  | K <sub>1</sub> | 30.94      | 22.89<br>5 | 26.14      | 28.17                       |                               |                              |                                    |                                       |                             |                             |
|                         | K <sub>2</sub> | 29.59<br>5 | 27.83      | 30.62<br>5 | 27.96                       |                               |                              |                                    |                                       |                             |                             |

|                        |              |       |       |       |       |
|------------------------|--------------|-------|-------|-------|-------|
|                        | K            | 23.23 | 33.04 | 27.00 |       |
|                        | <sub>3</sub> | 5     | 5     | 5     | 27.64 |
|                        | R            | 7.705 | 10.15 | 4.485 | 0.53  |
|                        | K            | 19.14 | 13.66 | 19.30 | 20.03 |
|                        | <sub>1</sub> | 71    | 52    | 8     | 88    |
|                        | K            | 20.65 | 18.79 | 20.49 | 20.68 |
| Content of             | <sub>2</sub> | 42    | 93    | 35    | 7     |
| Hesperidin             | K            | 19.66 | 27.00 | 19.66 | 18.74 |
|                        | <sub>3</sub> | 93    | 61    | 91    | 48    |
|                        | R            | 1.507 | 13.34 | 1.185 | 1.942 |
|                        |              | 1     | 09    | 5     | 2     |
|                        | K            | 1.448 | 1.342 | 1.625 | 1.532 |
|                        | <sub>1</sub> | 3     | 3     | 2     | 6     |
|                        | K            | 1.756 | 1.695 | 1.609 | 1.636 |
| Content of             | <sub>2</sub> | 2     |       | 9     | 5     |
| Astragaloside IV       | K            | 1.655 | 1.822 | 1.624 | 1.690 |
|                        | <sub>3</sub> | 5     | 7     | 9     | 9     |
|                        | R            | 0.307 | 0.480 | 0.015 | 0.158 |
|                        |              | 9     | 4     | 3     | 3     |
|                        | K            | 0.398 | 0.476 | 0.509 | 0.598 |
|                        | <sub>1</sub> |       | 5     | 3     | 8     |
|                        | K            | 0.551 | 0.534 | 0.591 | 0.611 |
| <i>W<sub>ave</sub></i> | <sub>2</sub> | 4     | 4     | 8     | 7     |
|                        | K            | 0.675 | 0.614 | 0.523 | 0.414 |
|                        | <sub>3</sub> | 6     | 1     | 9     | 5     |

|                       |   |       |       |       |       |
|-----------------------|---|-------|-------|-------|-------|
|                       | R | 0.277 | 0.137 | 0.082 | 0.197 |
|                       |   | 6     | 6     | 5     | 2     |
|                       | K | 17.97 | 17.89 | 17.89 | 17.76 |
|                       | 1 |       |       |       |       |
|                       | K | 18.1  | 17.91 | 18.03 | 18.07 |
| $\overline{A_{ave}}$  | 2 |       |       |       |       |
|                       | K | 17.94 | 18.34 | 18.09 | 18.18 |
|                       | 3 |       |       |       |       |
|                       | R | 0.16  | 0.45  | 0.2   | 0.42  |
|                       | K | 12.1  | 11.58 | 11.58 | 11.72 |
|                       | 1 |       |       |       |       |
|                       | K | 11.7  | 11.47 | 11.76 | 11.72 |
| $\overline{M_{wave}}$ | 2 |       |       |       |       |
|                       | K | 11.22 | 11.39 | 11.68 | 11.58 |
|                       | 3 |       |       |       |       |
|                       | R | 0.88  | 0.19  | 0.18  | 0.14  |

**Table S6.** Analysis of variance table of OED test in WE process

| Observations                | Source of Variance | Sum of Squared Deviations | Degrees of Freedom | F Radio                | F-Critical Value | Significance |
|-----------------------------|--------------------|---------------------------|--------------------|------------------------|------------------|--------------|
| Yield of Dry Extraction     | A                  | 11.244                    | 2                  | 5.622                  | 19.00            | $p<0.01$     |
|                             | B                  | 167.639                   | 2                  | 83.820                 | 19.00            | $p<0.01$     |
|                             | C                  | 26.979                    | 2                  | 13.489                 | 19.00            | $p<0.01$     |
|                             | D                  | 1.763                     | 2                  | 0.882                  | 19.00            | $p>0.05$     |
| Content of Total Sugar      | A                  | 22.664                    | 2                  | 11.332                 | 19.00            | $p<0.01$     |
|                             | B                  | 34.216                    | 2                  | 17.108                 | 19.00            | $p<0.01$     |
|                             | C                  | 7.501                     | 2                  | 3.751                  | 19.00            | $p<0.01$     |
|                             | D                  | 0.102                     | 2                  | 0.051                  | 19.00            | $p>0.05$     |
| Content of Hesperidin       | A                  | 0.781                     | 2                  | 0.390                  | 19.00            | $p<0.01$     |
|                             | B                  | 60.377                    | 2                  | 30.189                 | 19.00            | $p<0.01$     |
|                             | C                  | 0.492                     | 2                  | 0.246                  | 19.00            | $p>0.05$     |
|                             | D                  | 1.304                     | 2                  | 0.652                  | 19.00            | $p<0.01$     |
| Content of Astragaloside IV | A                  | 0.034                     | 2                  | 0.017                  | 19.00            | $p<0.01$     |
|                             | B                  | 0.088                     | 2                  | 0.044                  | 19.00            | $p<0.01$     |
|                             | C                  | $6.114 \times 10^{-6}$    | 2                  | $3.057 \times 10^{-6}$ | 19.00            | $p>0.05$     |

| Observations          | Source of Variance | Sum of Squared Deviations | Degrees of Freedom | F Ratio | F-Critical Value | Significance |
|-----------------------|--------------------|---------------------------|--------------------|---------|------------------|--------------|
|                       | D                  | 0.007                     | 2                  | 0.003   | 19.00            | $p>0.05$     |
| $W_{ave}$             | A                  | 0.026                     | 2                  | 5.514   | 19.00            | $p>0.05$     |
|                       | B                  | 0.006                     | 2                  | 0.874   | 19.00            | $p>0.05$     |
|                       | C                  | 0.003                     | 2                  | 0.331   | 19.00            | $p>0.05$     |
|                       | D                  | 0.016                     | 2                  | 2.727   | 19.00            | $p>0.05$     |
| $\overline{A_{ave}}$  | A                  | 0.142                     | 2                  | 1.054   | 19.00            | $p>0.05$     |
|                       | B                  | 0.298                     | 2                  | 2.607   | 19.00            | $p>0.05$     |
|                       | C                  | 0.108                     | 2                  | 0.775   | 19.00            | $p>0.05$     |
|                       | D                  | 0.126                     | 2                  | 0.921   | 19.00            | $p>0.05$     |
| $\overline{M_{wave}}$ | A                  | 0.254                     | 2                  | 6.644   | 19.00            | $p<0.01$     |
|                       | B                  | 0.243                     | 2                  | 6.136   | 19.00            | $P<0.05$     |
|                       | C                  | 0.010                     | 2                  | 0.140   | 19.00            | $p>0.05$     |
|                       | D                  | 0.010                     | 2                  | 0.137   | 19.00            | $p>0.05$     |

**Table S7.** Same important peaks identification from qNMR in this study.

| Chemical Shift (ppm) | Peak area       |                 |                 |                 |                 |                 |                 |                 |                 |                  |                        |
|----------------------|-----------------|-----------------|-----------------|-----------------|-----------------|-----------------|-----------------|-----------------|-----------------|------------------|------------------------|
|                      | NO.1            | NO.2            | NO.3            | NO.4            | NO.5            | NO.6            | NO.7            | NO.8            | NO.9            | OED optimization | Computing optimization |
| 2.93                 | 11454526.9<br>1 | 11537535.2<br>8 | 9266132.33      | 11345907.2<br>5 | 11939306.8<br>8 | 5761783.11      | 14164971.0<br>4 | 13224192.5<br>5 | 13839838.2<br>7 | 11302835.5<br>5  | 15038298.2<br>5        |
| 3.87                 | 975229.42       | 1050224.14      | 666964.55       | 833644.105      | 966248.245      | 401955.635      | 460471.055      | 994297.705      | 914281.96       | 996072.01        | 959667.195             |
| 5.41                 | 5540059.97      | 5233124.34      | 3804338.84      | 4746057.76<br>5 | 4210563.65      | 3875423.55<br>5 | 3148333.36      | 4156639.67      | 4196153.43<br>5 | 3237661.66<br>5  | 3677723.61<br>5        |
| 0.63                 | 14017726.8<br>5 | 15736797.4<br>5 | 7280167.64      | 9477185.89      | 23112447.9<br>2 | 14418125.5<br>3 | 23264025.8<br>4 | 18008448.6<br>5 | 19717640.4<br>6 | 13031761.2<br>5  | 26739496.0<br>6        |
| 1.79                 | 3135717.73<br>5 | 2831974.69      | 1517072.44<br>5 | 2519822.53      | 3124981.66<br>5 | 3749597.96      | 3775626.97      | 3228514.29<br>5 | 3449716.14      | 2543699.16       | 3542366.54             |
| 0.61                 | 9353203.04<br>5 | 10424304.3<br>9 | 9499038.68<br>5 | 10275496        | 11067877.7<br>3 | 5685545.54<br>5 | 11014359.5<br>4 | 11779540.0<br>9 | 13030474.7<br>6 | 11298351.4<br>1  | 12888226.0<br>7        |
| 0.64                 | 2920597.54      | 5785430.57      | 3827773.26      | 3891355.81      | 3730915.68      | 691056.56       | 3646904.05      | 2696641.99      | 3001857.85      | 2690787.63       | 3877442.31             |

| Chemical Shift (ppm) | Peak area  |            |            |            |            |            |            |            |            |                  |                        |
|----------------------|------------|------------|------------|------------|------------|------------|------------|------------|------------|------------------|------------------------|
|                      | NO.1       | NO.2       | NO.3       | NO.4       | NO.5       | NO.6       | NO.7       | NO.8       | NO.9       | OED optimization | Computing optimization |
|                      | 5          | 5          | 5          | 5          | 5          |            |            | 5          |            | 5                | 5                      |
| 1.72                 | 2376948.03 | 2749966.44 | 2097386.95 | 2546713.92 | 2945122.54 | 1487590.61 | 3028559.26 | 3121989.95 | 3471517.84 | 2774053.25       | 3680828.78             |
|                      |            | 5          | 5          | 5          |            | 5          | 5          |            | 5          |                  | 5                      |
| 1.74                 | 4393430.16 | 4797865.60 | 4256608.57 | 4654720.51 | 5399286.80 | 3386934.98 | 4096960.92 | 5471307.06 | 5832777.66 | 4434929.07       | 5260206.67             |
|                      | 5          | 5          | 5          |            | 5          |            | 5          | 5          | 5          | 5                |                        |
| 1.75                 | 3658858.08 | 4447181.40 | 3038950.92 | 4055347.53 | 3995395.75 | 3451659.42 | 4748256.59 | 3921931.61 | 3577484.79 | 3910455.08       | 4412677.69             |
|                      |            | 5          | 5          |            | 5          | 5          | 5          |            |            |                  |                        |
| 1.76                 | 10117948.0 | 10831743.7 | 9505591.14 | 10626926.1 | 12734797.5 | 7320678.19 | 12228937.4 | 13059440.4 | 14593762.6 | 11406455.4       | 13729467.3             |
|                      | 1          | 6          | 5          | 2          | 4          |            |            | 2          | 5          |                  | 6                      |
| 1.77                 | 2209420.44 | 3557639.11 | 1066403.48 | 2283943.89 | 3893544.69 | 2543846.51 | 2268515.82 | 4698722.58 | 5816705.39 | 3678646.06       | 4040190.14             |
|                      |            |            |            |            |            |            |            | 5          |            | 5                | 5                      |
| 2.90                 | 10292157.6 | 12025890.6 | 9430303.52 | 10870866.8 | 12484507.1 | 5769020.59 | 11440103.4 | 13465317.6 | 14373359.9 | 12303878.0       | 14530820.7             |
|                      | 3          | 6          | 5          | 2          | 4          | 5          | 7          | 6          | 7          | 5                | 4                      |

| Chemical Shift (ppm) | Peak area       |                 |                 |                 |                 |                 |                 |                 |                 |                  |                        |
|----------------------|-----------------|-----------------|-----------------|-----------------|-----------------|-----------------|-----------------|-----------------|-----------------|------------------|------------------------|
|                      | NO.1            | NO.2            | NO.3            | NO.4            | NO.5            | NO.6            | NO.7            | NO.8            | NO.9            | OED optimization | Computing optimization |
| 2.91                 | 13705180.1<br>4 | 19991831.2<br>6 | 7650475.75<br>5 | 14739294.5<br>7 | 17357430.0<br>2 | 10667047.3<br>6 | 19282166.6<br>2 | 18675123.3<br>5 | 22781758.6<br>1 | 17903594.0<br>5  | 21752978.6<br>6        |
| 3.27                 | 610500.68       | 398881.915      | 319120.635      | 439366.71       | 439388.81       | 357144.67       | 424680.51       | 384021.1        | 310278.55       | 343110.145       | 430678.47              |
| 3.34                 | 315945.695      | 213195.785      | 194588.37       | 269700.69       | 200712.595      | 249821.5        | 420467.725      | 240962.8        | 353373.595      | 341220.66        | 313382.885             |
| 3.44                 | 1905065.39      | 2029251.65      | 1334418.21      | 1706544.20<br>5 | 1778605.05      | 1258737.52<br>5 | 1194303.69      | 1858770.64      | 1749658.57      | 1355073.13<br>5  | 1455821.71<br>5        |
| 3.49                 | 2329158.52      | 2577697         | 1559998.07      | 2205605.02      | 2171328.25<br>5 | 1236773.71      | 1163666.35      | 1973411.49<br>5 | 2061503.94      | 1530217.54       | 1775575.95             |
| 3.54                 | 1979526.67<br>5 | 1922769.41<br>5 | 1242027.44<br>5 | 1769980.66      | 1643855.33      | 1073117.91<br>5 | 1164809.95      | 1480813.33      | 1568927.27<br>5 | 1208677.14<br>5  | 1296559.18<br>5        |
| 3.56                 | 2590120.53      | 4588664.06<br>5 | 1854830.89<br>5 | 2989140.25<br>5 | 2725988.33      | 2216958.65<br>5 | 3329117.55      | 2735136.94<br>5 | 4734093.71      | 2747935.8        | 3093780.54<br>5        |
| 3.57                 | 2753923.96      | 3760658.57      | 2224088.55      | 1507552.34      | 2302651.91      | 2855537.17      | 2695378.58      | 1806064.78      | 3007288.86      | 1143881.34       | 1397078.61             |



| Chemical Shift (ppm) | Peak area       |                 |                 |                 |                 |                 |                 |                 |                 |                  |                        |
|----------------------|-----------------|-----------------|-----------------|-----------------|-----------------|-----------------|-----------------|-----------------|-----------------|------------------|------------------------|
|                      | NO.1            | NO.2            | NO.3            | NO.4            | NO.5            | NO.6            | NO.7            | NO.8            | NO.9            | OED optimization | Computing optimization |
|                      |                 |                 |                 |                 |                 | 5               | 5               | 5               |                 | 5                | 5                      |
| 3.67                 | 16973641.3      | 17914732.1<br>3 | 12257128.5<br>3 | 16227635.6<br>5 | 16889342.1<br>6 | 9993111.18<br>5 | 9136190.55<br>5 | 14885578.4<br>8 | 16192876.1<br>3 | 11430701.5<br>5  | 13104142.3<br>2        |
| 3.78                 | 1979945.70<br>5 | 2293770.17      | 1388859.53<br>5 | 933069.99       | 2040419.00<br>5 | 1079684.25      | 1239000.35      | 1134147.87<br>5 | 1824931.82      | 1421835.06<br>5  | 1626468                |
| 3.79                 | 165354.835      | 6834643.79      | 3989896.29      | 1002461.77      | 9681635.63<br>5 | 4665141.34      | 5054533.97<br>5 | 7645433.42<br>5 | 9125199.52<br>5 | 7008404.88       | 293365.465             |
| 3.80                 | 7705070.51      | 8092189.18<br>5 | 4455262.92      | 8005834.34<br>5 | 9827530.83      | 7554101.14      | 2886230.06<br>5 | 8999296.99      | 12373223        | 5834924.6        | 7667023.75             |
| 3.81                 | 13517552.3<br>6 | 14372303.4      | 10798712.3<br>8 | 11079150.1<br>2 | 13461077.8<br>5 | 11130638.6<br>5 | 12043723.5<br>6 | 9411795.75<br>5 | 12160475.3      | 9008590.12       | 7220166.25<br>5        |
| 3.88                 | 2237213.16<br>5 | 2713335.05      | 1464372.28<br>5 | 1891664.75      | 2596913.86<br>5 | 1527041.14      | 1301400.04      | 1969410.85      | 2031612.03      | 2161250.7        | 2021911.61             |

| Chemical Shift (ppm) | Peak area       |                 |                 |                 |                 |                 |                 |                 |                 |                  |                        |
|----------------------|-----------------|-----------------|-----------------|-----------------|-----------------|-----------------|-----------------|-----------------|-----------------|------------------|------------------------|
|                      | NO.1            | NO.2            | NO.3            | NO.4            | NO.5            | NO.6            | NO.7            | NO.8            | NO.9            | OED optimization | Computing optimization |
| 3.89                 | 1064466.25<br>5 | 1644069.13<br>5 | 651470.38       | 890521.55       | 850229.09       | 560913.325      | 494696.325      | 1506280.39<br>5 | 856050.085      | 601645.795       | 683180.745             |
| 3.99                 | 1203077.64      | 827561.73       | 524341.915      | 617671.52       | 592347.78       | 403391.975      | 882815.335      | 607029.735      | 457597.465      | 627471.615       | 733088.515             |
| 4.02                 | 1976254.84<br>5 | 2126845.15      | 1421364.82<br>5 | 1776329.66<br>5 | 1924774.26<br>5 | 1137067.04<br>5 | 837225.245      | 1749080.91      | 1826451.10<br>5 | 1234003.88       | 1611223.88             |
| 4.07                 | 2172445.97<br>5 | 2060923.33      | 1361528.64      | 1825813.03      | 1826427.57      | 1232368.73      | 1141126.57<br>5 | 1628125.57      | 1684746.16<br>5 | 1205091.04<br>5  | 1525086.11             |
| 4.20                 | 4058215.82      | 3875661.26      | 3066871.17<br>5 | 4252647.92<br>5 | 3359090.24      | 2235409.98      | 2039277.82      | 4182280.69      | 1063335.30<br>5 | 3227384.05<br>5  | 2320883.11             |

**Table S8.** Same peaks identification from HPLC fingerprint analysis in this study.

| Retention Time<br>(min) | Peak area    |               |               |              |              |              |               |              |              |  | OED optimization | Computing optimization |
|-------------------------|--------------|---------------|---------------|--------------|--------------|--------------|---------------|--------------|--------------|--|------------------|------------------------|
|                         | NO.1         | NO.2          | NO.3          | NO.4         | NO.5         | NO.6         | NO.7          | NO.8         | NO.9         |  |                  |                        |
| 2.193                   | 661051       | 1696263.<br>1 | 1526555.<br>4 | 140689<br>3  | 109207<br>6  | 674929.<br>6 | 1209560.<br>8 | 130583<br>6  | 161620<br>3  |  | 1733608          | 1521460                |
| 2.374                   | 213058<br>1  | 2795863.<br>9 | 2678988.<br>8 | 277087<br>9  | 200799<br>4  | 179516<br>3  | 2392183.<br>1 | 234236<br>2  | 253337<br>2  |  | 3181681          | 3155345                |
| 2.619                   | 175019.<br>2 | 89110.02      | 96790.72<br>7 | 43107.7<br>1 | 115807.<br>8 | 495469.<br>8 | 85892.76<br>4 | 129392.<br>1 | 200877.<br>4 |  | 84305.35         | 83074.195              |
| 3.046                   | 375220.<br>8 | 808107.5<br>6 | 578758.4<br>7 | 539068.<br>4 | 612416.<br>9 | 419094.<br>5 | 574043.5      | 632688.<br>5 | 822320.<br>7 |  | 943303.3         | 900400.84              |
| 9.397                   | 13986.0<br>3 | 17318.34      | 28303.53<br>1 | 16898.1<br>4 | 18514.8<br>2 | 12232.1<br>4 | 16768.34<br>3 | 18514.7<br>7 | 31811.9<br>8 |  | 45119.84         | 36802.572              |
| 25.918                  | 18618.8<br>3 | 17521.72<br>1 | 16907.12<br>6 | 19524.3<br>2 | 13058.3<br>3 | 12405.1<br>2 | 14089.80<br>3 | 9164.40<br>8 | 12725.1<br>6 |  | 12514.25         | 10746.536              |

| Retention Time<br>(min) | Peak area    |               |               |              |              |              |               |              |              |          | OED optimization | Computing optimization |
|-------------------------|--------------|---------------|---------------|--------------|--------------|--------------|---------------|--------------|--------------|----------|------------------|------------------------|
|                         | NO.1         | NO.2          | NO.3          | NO.4         | NO.5         | NO.6         | NO.7          | NO.8         | NO.9         |          |                  |                        |
| 35.578                  | 15016.8<br>8 | 14993.20<br>2 | 14145.10<br>6 | 11894.1<br>9 | 12447.6<br>4 | 13100.8<br>8 | 18982.96<br>3 | 18772.4<br>2 | 13879.3      | 19177.75 | 12904.029        |                        |
| 38.950                  | 19826.7<br>1 | 28438.21<br>7 | 21393.04<br>2 | 14578.4<br>4 | 11150.6<br>6 | 14302.2<br>2 | 22881.23<br>2 | 8786.01<br>2 | 12314.7<br>6 | 26396.88 | 15637.017        |                        |
| 42.773                  | 14513.8<br>9 | 16170.94<br>1 | 15775.18<br>6 | 23093.8<br>2 | 11637.3<br>6 | 17294.5<br>3 | 21226.92<br>7 | 17593.4<br>4 | 13150.8<br>5 | 20290.83 | 18008.108        |                        |
| 43.288                  | 95234.6<br>5 | 149137.7<br>4 | 192910.5<br>2 | 214435.<br>4 | 183270.<br>8 | 163315       | 209719.4<br>6 | 195167.<br>9 | 241496.<br>2 | 241511.8 | 201475.31        |                        |
| 46.399                  | 192747.<br>4 | 326629.6<br>7 | 528129.7<br>2 | 275544.<br>1 | 344142.<br>5 | 513346.<br>2 | 392474.8<br>1 | 378426.<br>6 | 497024.<br>4 | 343465   | 425288.8         |                        |
| 48.476                  | 117233.<br>1 | 117590.4<br>8 | 100636.9<br>1 | 120210       | 95930.9<br>1 | 111619       | 146504.4<br>4 | 131616.<br>5 | 103419.<br>7 | 147096.4 | 117783.93        |                        |
| 51.544                  | 81144.1<br>3 | 106994.2<br>5 | 119950.9<br>6 | 89160.0<br>8 | 98603.2<br>3 | 131598.<br>2 | 77735.80<br>5 | 95905.4      | 105521       | 62004.56 | 55039.053        |                        |

| Retention Time<br>(min) | Peak area    |               |               |              |              |              |               |              |              |                  |                        |
|-------------------------|--------------|---------------|---------------|--------------|--------------|--------------|---------------|--------------|--------------|------------------|------------------------|
|                         | NO.1         | NO.2          | NO.3          | NO.4         | NO.5         | NO.6         | NO.7          | NO.8         | NO.9         | OED optimization | Computing optimization |
| 54.464                  | 78940.5<br>4 | 191319.2      | 209984.6<br>3 | 120213.<br>1 | 99238.1      | 86533.7<br>5 | 108925.5<br>4 | 151757.<br>4 | 106195.<br>6 | 169350.5         | 230626.36              |
| 59.450                  | 204726.<br>5 | 263407.8<br>8 | 283359.2<br>3 | 252669.<br>5 | 237241.<br>5 | 362701.<br>6 | 278326.9<br>8 | 257006.<br>1 | 360258.<br>9 | 344675.3         | 452794.3               |
| 79.040                  | 15447.8<br>4 | 12535.81<br>8 | 27042.78<br>5 | 20978.4<br>4 | 13604.3<br>5 | 21959.6<br>6 | 12116.33<br>8 | 10673.8<br>4 | 12375.9<br>1 | 12283.37         | 14009.096              |
| 80.223                  | 55446.5      | 95763.04<br>3 | 116187.7<br>3 | 82028.4<br>6 | 90159.5<br>4 | 122499.<br>3 | 79846.56<br>7 | 93952.6<br>5 | 138350       | 126319.2         | 170404.13              |
| 85.526                  | 13668.8<br>3 | 14229.59<br>9 | 14760.40<br>2 | 16468        | 17886.6<br>3 | 26897.2<br>6 | 15946.32<br>7 | 14911.8<br>2 | 22531.4<br>3 | 16966.27         | 26654.664              |
| 86.906                  | 39384.4<br>7 | 61505.60<br>2 | 376722.9<br>9 | 197315.<br>1 | 44216.0<br>7 | 462987.<br>9 | 88296.80<br>7 | 86576.3<br>8 | 73674.3<br>3 | 73253.65         | 253517.86              |
| 88.638                  | 84017.4      | 115308.7<br>9 | 128183.4<br>9 | 85550.9<br>4 | 109686.<br>1 | 113128.<br>5 | 111244        | 116022.<br>7 | 141011.<br>2 | 125843.7         | 120991.16              |

| Retention Time<br>(min) | Peak area    |               |               |              |              |              |               |              |              |       | OED optimization | Computing optimization |
|-------------------------|--------------|---------------|---------------|--------------|--------------|--------------|---------------|--------------|--------------|-------|------------------|------------------------|
|                         | NO.1         | NO.2          | NO.3          | NO.4         | NO.5         | NO.6         | NO.7          | NO.8         | NO.9         | NO.10 |                  |                        |
| 89.126                  | 42243.2<br>8 | 71264.12<br>9 | 49136.66      | 43164.5<br>3 | 70229.6<br>3 | 69820.8<br>7 | 63701.74<br>2 | 83723.4      | 85344.7<br>8 |       | 87425.01         | 73257.094              |
| 92.027                  | 80129.4<br>5 | 98708.53<br>1 | 101139.4<br>2 | 91590.6<br>7 | 92424.2<br>7 | 46298.0<br>2 | 34079.86<br>6 | 41697.2<br>5 | 41817.1<br>6 |       | 23303.55         | 28345.684              |
| 92.678                  | 158013.<br>3 | 185791.7<br>8 | 176818.2<br>9 | 176456.<br>4 | 173640.<br>2 | 88284.2<br>2 | 36572.33<br>6 | 76490.2<br>8 | 75189.1<br>2 |       | 25015.44         | 33639.84               |
| 96.132                  | 11081.9<br>4 | 15048.75      | 15285.81<br>1 | 10148.6<br>2 | 12988.5      | 14301.4<br>3 | 13642.95      | 15477.4<br>4 | 18392.8<br>3 |       | 15611.19         | 15782.153              |
| 103.252                 | 57575.9<br>8 | 59367.95<br>4 | 59234.81<br>7 | 58143.1<br>4 | 57900.1<br>9 | 25975.6<br>6 | 26278.66      | 27241.2<br>2 | 22915.8<br>6 |       | 19127.81         | 19758.927              |
| 107.970                 | 22016.0<br>4 | 27644.62<br>6 | 22665.72<br>4 | 29874.0<br>5 | 26537.0<br>9 | 9601.61<br>1 | 8772.771<br>5 | 12301        | 14759.9<br>4 |       | 10911.51         | 8118.3245              |
| 110.466                 | 185020.<br>7 | 189196.8<br>5 | 189445.2<br>9 | 190120.<br>3 | 191404.<br>7 | 58874.6<br>7 | 59669.31<br>3 | 60107.3<br>8 | 57676.9<br>6 |       | 56161.03         | 55283.932              |

| Retention Time<br>(min) | Peak area    |               |               |              |              |              |               |              |              |  | OED optimization | Computing optimization |
|-------------------------|--------------|---------------|---------------|--------------|--------------|--------------|---------------|--------------|--------------|--|------------------|------------------------|
|                         | NO.1         | NO.2          | NO.3          | NO.4         | NO.5         | NO.6         | NO.7          | NO.8         | NO.9         |  |                  |                        |
| 114.193                 | 93810.1<br>4 | 101397.0<br>9 | 100043.1<br>2 | 101176.<br>7 | 100674       | 36407.0<br>8 | 38577.19<br>4 | 38430.6<br>6 | 35000.7<br>7 |  | 33227.17         | 32459.584              |
| 116.653                 | 55064.7<br>2 | 56950.27<br>7 | 55983.51<br>2 | 56479.3<br>2 | 57540.3<br>5 | 14546.3<br>7 | 15386.85<br>5 | 14901.7<br>7 | 13566.4<br>4 |  | 13705.2          | 13507.394              |

**Table S9.** Same peaks identification from M<sub>w</sub> analysis in this study.

| Sample | Peak 1               |                     | Peak 2               |                     | Peak 3               |                     | Peak 4               |                     | Peak 5               |                     |
|--------|----------------------|---------------------|----------------------|---------------------|----------------------|---------------------|----------------------|---------------------|----------------------|---------------------|
|        | M <sub>w</sub> (kDa) | Duration Time (min) |
| NO.1   | >2457                | 17.610-<br>25.070   | 602.088              | 30.135-<br>31.810   | 244.511              | 31.810-<br>33.130   | 55.583               | 37.790-<br>38.550   | <12.6                | 42.520-<br>45.550   |
| NO.2   | >2457                | 16.425-<br>24.676   | 606.589              | 29.380-<br>31.100   | 447.252              | 31.100-<br>32.250   | 103.595              | 34.300-<br>36.500   | <12.6                | 42.54-<br>46.34     |
| NO.3   | >2457                | 17.315-<br>26.150   | 671.217              | 29.660-<br>31.220   | 506.007              | 31.220-<br>31.970   | 120.621              | 33.780-<br>35.950   | <12.6                | 21.130-<br>45.680   |
| NO.4   | >2457                | 17.505-<br>26.623   | 422.829              | 30.590-<br>32.320   | 308.595              | 32.320-<br>33.650   | 75.783               | 35.900-<br>37.000   | <12.6                | 42.250-<br>45.800   |
| NO.5   | >2457                | 18.400-<br>28.100   | 622.902              | 29.200-<br>31.700   | 320.782              | 32.600-<br>33.600   | 66.451               | 35.950-<br>37.250   | <12.6                | 42.300-<br>45.810   |
| NO.6   | >2457                | 18.550-<br>28.300   | 471.764              | 29.700-<br>32.200   | 200.464              | 32.900-<br>34.050   | 48.473               | 36.020-<br>37.600   | <12.6                | 42.200-<br>46.100   |
| NO.7   | >2457                | 18.900-             | 490.787              | 29.250-             | 266.465              | 31.600-             | 48.686               | 35.900-             | <12.6                | 42.200-             |



|      |       |                   |         |                   |         |                   |        |                   |       |                   |
|------|-------|-------------------|---------|-------------------|---------|-------------------|--------|-------------------|-------|-------------------|
|      |       | 27.900            |         | 31.330            |         | 34.100            |        | 37.700            |       | 46.750            |
| NO.8 | >2457 | 19.850-<br>28.900 | 444.011 | 30.100-<br>32.100 | 262.006 | 32.200-<br>34.700 | 42.396 | 36.550-<br>38.175 | <12.6 | 42.250-<br>46.400 |
| NO.9 | >2457 | 20.250-<br>29.200 | 408.445 | 30.000-<br>32.350 | 256.318 | 32.500-<br>34.000 | 37.725 | 36.500-<br>38.350 | <12.6 | 42.500-<br>45.900 |

**Table S10.** Components identified in ideal extracts of BSG.

| Peak Number                     | Identification Component                | Molecular Formula                               | Retention Time (min) | Theoretical Mass (m/z) | Experimental Mass (m/z) | Delta mmu | Main MS/MS Fragments Detected                  | Mode |
|---------------------------------|-----------------------------------------|-------------------------------------------------|----------------------|------------------------|-------------------------|-----------|------------------------------------------------|------|
| Flavonoids and their glycosides |                                         |                                                 |                      |                        |                         |           |                                                |      |
| 1                               | Rutin                                   | C <sub>27</sub> H <sub>30</sub> O <sub>16</sub> | 19.32                | 611.1606               | 611.1620                | 1.389     | 303.0564; 153.0194; 285.0760                   | +H   |
| 2                               | Vicenin II                              | C <sub>27</sub> H <sub>30</sub> O <sub>15</sub> | 22.52                | 593.1500               | 593.1518                | 1.764     | 437.1595; 415.1756; 537.2102; 371.1490         | -H   |
| 3                               | Isorhamnetin-3- <i>O</i> -neohesperidin | C <sub>28</sub> H <sub>32</sub> O <sub>16</sub> | 24.33                | 623.1606               | 623.1625                | 0.999     | 623.1611; 383.0773; 339.0489; 312.0637         | -H   |
| 4                               | Narirutin 4'-glucoside                  | C <sub>33</sub> H <sub>42</sub> O <sub>19</sub> | 24.65                | 741.2236               | 741.2255                | 1.865     | 271.0611; 151.0036; 433.1138; 272.0643         | -H   |
| 5                               | Naringin-7- <i>O</i> -glucoside         | C <sub>21</sub> H <sub>22</sub> O <sub>10</sub> | 24.70                | 435.1285               | 435.1293                | 0.727     | 200.2374; 201.2409; 116.1434; 57.0701; 71.0779 | +H   |
| 6                               | Oroxylin A glucoronide                  | C <sub>22</sub> H <sub>23</sub> O <sub>10</sub> | 31.63                | 447.1285               | 447.1291                | 0.547     | 285.0757; 270.0522; 286.0791                   | +H   |
| 7                               | Baicalin                                | C <sub>21</sub> H <sub>18</sub> O <sub>11</sub> | 31.87                | 445.0765               | 445.0803                | -2.091    | 269.0414; 224.0482; 240.0387                   | -H   |

| Peak Number | Identification Component      | Molecular Formula                               | Retention Time (min) | Theoretical Mass (m/z) | Experimental Mass (m/z) | Delta mmu | Main MS/MS Fragments Detected                              | Mode |
|-------------|-------------------------------|-------------------------------------------------|----------------------|------------------------|-------------------------|-----------|------------------------------------------------------------|------|
| 8           | Eriocitrin                    | C <sub>27</sub> H <sub>32</sub> O <sub>15</sub> | 31.91                | 595.1657               | 595.1674                | 1.673     | 151.0035; 107.0138; 135.0451; 287.0561;                    | -H   |
| 9           | Genistin                      | C <sub>21</sub> H <sub>20</sub> O <sub>10</sub> | 32.55                | 433.1129               | 433.1131                | 0.267     | 433.1496; 271.0591                                         | +H   |
| 10          | Vicenin III                   | C <sub>26</sub> H <sub>28</sub> O <sub>14</sub> | 32.66                | 563.1395               | 563.1409                | 1.458     | N/A                                                        | -H   |
| 11          | Quercetin                     | C <sub>15</sub> H <sub>10</sub> O <sub>7</sub>  | 32.88                | 303.0499               | 303.0503                | 0.391     | 303.0864; 234.9901; 285.0768; 243.0642; 261.0766; 287.0535 | +H   |
| 12          | Kaempferol 3-gentiobioside    | C <sub>27</sub> H <sub>30</sub> O <sub>16</sub> | 32.96                | 609.1450               | 609.1467                | 1.779     | 300.0277; 255.0310; 301.0343; 69.0283; 271.0250;           | -H   |
| 13          | Apigenin                      | C <sub>15</sub> H <sub>10</sub> O <sub>5</sub>  | 33.22                | 269.0444               | 269.0458                | 1.39      | 269.2121; 281.2031                                         | -H   |
| 14          | Kaempferol 3-neohesperidoside | C <sub>27</sub> H <sub>30</sub> O <sub>15</sub> | 33.75                | 593.1500               | 593.1511                | 1.084     | 179.0558; 133.0141                                         | +H   |
| 15          | Homoplantagin                 | C <sub>22</sub> H <sub>22</sub> O <sub>11</sub> | 36.74                | 461.1078               | 461.1095                | 1.692     | 417.2987; 373.3093                                         | -H   |
| 16          | Narirutin                     | C <sub>27</sub> H <sub>32</sub> O <sub>14</sub> | 38.51                | 579.1708               | 579.1724                | 1.658     | 271.0613; 107.0138; 151.0036; 272.0647; 119.0501;          | -H   |

| Peak Number | Identification Component    | Molecular Formula                               | Retention Time (min) | Theoretical Mass (m/z) | Experimental Mass (m/z) | Delta mmu | Main MS/MS Fragments Detected                            | Mode |
|-------------|-----------------------------|-------------------------------------------------|----------------------|------------------------|-------------------------|-----------|----------------------------------------------------------|------|
| 17          | Naringin chalcone           | C <sub>15</sub> H <sub>12</sub> O <sub>5</sub>  | 38.53                | 273.0757               | 273.0759                | 0.210     | 273.0757; 248.8788; 171.0289; 153.0183                   | +H   |
| 18          | 7-O-Methyluteolin           | C <sub>16</sub> H <sub>12</sub> O <sub>6</sub>  | 39.42                | 301.0706               | 301.0707                | 0.045     | 286.0485; 153.0504                                       | +H   |
| 19          | Rhoifolin                   | C <sub>27</sub> H <sub>30</sub> O <sub>14</sub> | 39.83                | 577.1551               | 577.1567                | 1.558     | 269.0456; 68.7911; 99.9255                               | -H   |
| 20          | Calycosin-7-O-β-D-glucoside | C <sub>22</sub> H <sub>22</sub> O <sub>10</sub> | 40.39                | 445.1129               | 445.1140                | 1.117     | 268.0375; 239.0347; 283.0612                             | -H   |
| 21          | Rhamnocitrin                | C <sub>16</sub> H <sub>12</sub> O <sub>6</sub>  | 41.50                | 299.0550               | 299.0563                | 1.325     | 93.0344; 137.0244; 152.8950                              | -H   |
| 22          | Diosmin                     | C <sub>28</sub> H <sub>32</sub> O <sub>15</sub> | 41.62                | 609.1813               | 609.1803                | -1.037    | 303.0863                                                 | +H   |
| 23          | Hesperetin                  | C <sub>16</sub> H <sub>14</sub> O <sub>6</sub>  | 43.11                | 301.0705               | 301.0719                | -0.547    | 151.0037; 196.0012; 164.0116                             | -H   |
| 24          | Neohesperidin               | C <sub>28</sub> H <sub>34</sub> O <sub>15</sub> | 43.11                | 609.1813               | 609.1826                | 1.283     | 301.0718; 164.0116; 151.0037; 302.0748; 286.0484         | -H   |
| 25          | Hesperidin                  | C <sub>28</sub> H <sub>34</sub> O <sub>15</sub> | 43.13                | 611.197                | 611.198                 | 1.013     | 303.0864; 85.0284; 71.0492; 153.0183; 177.0548; 195.0292 | +H   |

| Peak Number | Identification Component | Molecular Formula                               | Retention Time (min) | Theoretical Mass (m/z) | Experimental Mass (m/z) | Delta mmu | Main MS/MS Fragments Detected                                                      | Mode |
|-------------|--------------------------|-------------------------------------------------|----------------------|------------------------|-------------------------|-----------|------------------------------------------------------------------------------------|------|
| 26          | Isosakuranin             | C <sub>22</sub> H <sub>24</sub> O <sub>10</sub> | 43.13                | 449.1442               | 449.1449                | 0.677     | 195.0290; 263.0551; 85.0285;<br>245.0445; 219.0291; 177.0547;<br>165.0185; 69.0336 | +H   |
| 27          | Formononetin             | C <sub>16</sub> H <sub>12</sub> O <sub>4</sub>  | 47.56                | 267.0651               | 267.0662                | 1.035     | 252.0428; 267.0663; 223.0400;<br>253.0464; 251.0353                                | -H   |
| 28          | Ononin                   | C <sub>22</sub> H <sub>22</sub> O <sub>9</sub>  | 47.58                | 431.1336               | 431.1342                | 0.561     | 269.0808; 241.0864; 137.0232;<br>133.0645                                          | +H   |
| 29          | Pinocembrin              | C <sub>15</sub> H <sub>12</sub> O <sub>4</sub>  | 50.00                | 255.0651               | 255.0662                | 1.035     | 255.2330; 133.7852; 116.9281; 74.0247                                              | -H   |
| 30          | Tangeretin               | C <sub>20</sub> H <sub>20</sub> O <sub>7</sub>  | 51.02                | 371.1125               | 371.1137                | 1.211     | 315.2539; 316.2578; 297.2425                                                       | -H   |
| 31          | Eriodictyol              | C <sub>15</sub> H <sub>12</sub> O <sub>6</sub>  | 52.34                | 283.0550               | 287.0558                | 0.805     | 287.7753; 243.0325                                                                 | -H   |
| 32          | (R)-Isomucronulatol      | C <sub>17</sub> H <sub>18</sub> O <sub>5</sub>  | 52.59                | 303.1227               | 303.1233                | 0.62      | 303.0862; 285.0754                                                                 | +H   |
| 33          | Wogonin                  | C <sub>16</sub> H <sub>12</sub> O <sub>5</sub>  | 52.71                | 283.0600               | 283.0612                | 1.12      | 283.0613; 251.0351; 223.0401                                                       | -H   |
| 34          | Calycosin                | C <sub>16</sub> H <sub>12</sub> O <sub>5</sub>  | 52.72                | 285.0757               | 285.0759                | 0.21      | 285.0758; 270.0522; 137.0234                                                       | +H   |

| Peak Number | Identification Component     | Molecular Formula                               | Retention Time (min) | Theoretical Mass (m/z) | Experimental Mass (m/z) | Delta mmu | Main MS/MS Fragments Detected                                      | Mode |
|-------------|------------------------------|-------------------------------------------------|----------------------|------------------------|-------------------------|-----------|--------------------------------------------------------------------|------|
| 35          | Didymin                      | C <sub>28</sub> H <sub>34</sub> O <sub>14</sub> | 52.84                | 593.1864               | 593.1877                | 1.258     | 285.0770; 286.0804; 151.0037                                       | -H   |
| 36          | Kumatakenin                  | C <sub>17</sub> H <sub>14</sub> O <sub>6</sub>  | 54.57                | 315.0863               | 315.0865                | 0.265     | 269.3028                                                           | +H   |
| 37          | Naringenin                   | C <sub>15</sub> H <sub>12</sub> O <sub>5</sub>  | 58.65                | 273.0759               | 273.0762                | 0.511     | 271.3189; 129.0783; 272.3223; 187.2253                             | +H   |
| 38          | Melitidin                    | C <sub>33</sub> H <sub>40</sub> O <sub>18</sub> | 59.89                | 723.2130               | 723.2149                | 1.809     | 57.0345; 402.0956; 387.0727; 359.0774; 417.1190; 329.0305; 99.0450 | -H   |
| 39          | 5,7,8,4'-Tetramethoxyflavone | C <sub>19</sub> H <sub>18</sub> O <sub>6</sub>  | 67.9                 | 343.1176               | 343.1180                | 0.395     | 343.1178; 328.0943; 313.0707; 299.0910                             | +H   |
| 40          | 6-Demethoxytangeretin        | C <sub>19</sub> H <sub>18</sub> O <sub>6</sub>  | 68.58                | 341.1019               | 341.1030                | 1.125     | 341.1092; 204.5641; 179.0561; 161.0460                             | -H   |
| 41          | Eupatilin                    | C <sub>18</sub> H <sub>16</sub> O <sub>7</sub>  | 70.32                | 343.0812               | 343.0823                | 1.141     | 315.2537; 297.2441; 171.1034                                       | -H   |
| 42          | Nobiletin                    | C <sub>21</sub> H <sub>22</sub> O <sub>8</sub>  | 70.85                | 403.1387               | 403.1389                | 0.236     | 388.1153; 373.0930; 327.0860; 284.0673                             | +H   |

| Peak Number                  | Identification Component | Molecular Formula                              | Retention Time (min) | Theoretical Mass (m/z) | Experimental Mass (m/z) | Delta mmu | Main MS/MS Fragments Detected                              | Mode |
|------------------------------|--------------------------|------------------------------------------------|----------------------|------------------------|-------------------------|-----------|------------------------------------------------------------|------|
| 43                           | Isosakuranetin           | C <sub>16</sub> H <sub>14</sub> O <sub>5</sub> | 71.40                | 285.0757               | 285.0769                | 1.150     | 285.0769; 164.0114; 196.0013; 286.0800; 136.0167; 151.0036 | -H   |
| 44                           | Chrysosplenetin B        | C <sub>19</sub> H <sub>18</sub> O <sub>8</sub> | 71.50                | 373.0917               | 373.0930                | 1.286     | 343.0461; 358.0695; 328.0218; 344.0480; 312.9982; 285.0028 | -H   |
| 45                           | Isosinensetin            | C <sub>20</sub> H <sub>20</sub> O <sub>7</sub> | 74.32                | 373.1281               | 373.1285                | 0.391     | 358.1046; 343.0814; 315.0876; 287.0889                     | +H   |
| 46                           | Demethylnobiletin        | C <sub>20</sub> H <sub>20</sub> O <sub>8</sub> | 78.07                | 389.1230               | 389.1230                | -0.074    | 359.0780; 341.0656; 285.0761                               | +H   |
| 47                           | Gardenin B               | C <sub>19</sub> H <sub>18</sub> O <sub>7</sub> | 83.26                | 359.1125               | 359.1128                | 0.351     | N/A                                                        | +H   |
| Lignans and their glycosides |                          |                                                |                      |                        |                         |           |                                                            |      |
| 48                           | Schisanwilsonin A        | C <sub>27</sub> H <sub>32</sub> O <sub>9</sub> | 56.25                | 501.2119               | 501.2123                | 0.431     | 479.1825; 418.1969; 375.1808; 83.0492                      | +H   |
| 49                           | Gomisin S                | C <sub>23</sub> H <sub>30</sub> O <sub>7</sub> | 68.96                | 419.2064               | 419.207                 | 0.66      | 419.2771; 401.1971; 379.1229; 300.0993                     | +H   |
| 50                           | Schisandrin              | C <sub>24</sub> H <sub>32</sub> O <sub>7</sub> | 72.42                | 433.2220               | 433.2224                | 0.762     | 152.9958; 78.9590                                          | +H   |

| Peak Number | Identification Component | Molecular Formula                               | Retention Time (min) | Theoretical Mass (m/z) | Experimental Mass (m/z) | Delta mmu | Main MS/MS Fragments Detected                                                              | Mode |
|-------------|--------------------------|-------------------------------------------------|----------------------|------------------------|-------------------------|-----------|--------------------------------------------------------------------------------------------|------|
| 51          | Schisantherin E          | C <sub>30</sub> H <sub>34</sub> O <sub>9</sub>  | 73.12                | 539.2275               | 539.226                 | -1.489    | 89.0597; 133.0860; 327.2015; 177.1122; 540.5418                                            | +H   |
| 52          | Taccalonolide A          | C <sub>36</sub> H <sub>46</sub> O <sub>14</sub> | 73.94                | 701.2803               | 701.2821                | 1.788     | 717.8382; 236.0506; 115.9207; 99.0452                                                      | -H   |
| 53          | Gomisin J                | C <sub>22</sub> H <sub>28</sub> O <sub>6</sub>  | 75.03                | 389.1958               | 389.196                 | 0.215     | 389.1960; 287.0914; 227.0704; 357.1700                                                     | +H   |
| 54          | Gomisin O/ Gomisin A     | C <sub>23</sub> H <sub>28</sub> O <sub>7</sub>  | 75.90                | 417.1907               | 417.1912                | 0.470     | 417.2272; 316.1305; 301.1071<br>347.1490; 285.1118; 418.2307; 402.2038; 242.0937; 317.1349 | +H   |
| 55          | Schisandrin B            | C <sub>13</sub> H <sub>10</sub> O               | 76.36                | 183.0785               | 183.0807                | 0.318     | 105.0336; 183.0807; 95.0492; 106.0369                                                      | +H   |
| 56          | Benzoylgomisin H         | C <sub>30</sub> H <sub>34</sub> O <sub>8</sub>  | 79.21                | 523.2326               | 523.2312                | -1.384    | 523.2307; 493.1824; 315.1230                                                               | +H   |
| 57          | Schisphenlignan A        | C <sub>29</sub> H <sub>30</sub> O <sub>9</sub>  | 80.42                | 523.1962               | 523.2307                | -1.934    | 523.2307; 105.0336; 524.2348                                                               | +H   |
| 58          | Bulbocol                 | C <sub>23</sub> H <sub>24</sub> O <sub>4</sub>  | 82.07                | 365.1747               | 365.1756                | 0.864     | N/A                                                                                        | +H   |
| 59          | Schisanhenol             | C <sub>23</sub> H <sub>30</sub> O <sub>6</sub>  | 86.26                | 403.2115               | 403.2121                | 0.615     | 111.0087; 99.9257; 154.9472; 116.9284                                                      | +H   |



| Peak Number | Identification Component    | Molecular Formula                              | Retention Time (min) | Theoretical Mass (m/z) | Experimental Mass (m/z) | Delta mmu | Main MS/MS Fragments Detected                                                             | Mode |
|-------------|-----------------------------|------------------------------------------------|----------------------|------------------------|-------------------------|-----------|-------------------------------------------------------------------------------------------|------|
| 60          | Gomisin G / Schisantherin A | C <sub>30</sub> H <sub>32</sub> O <sub>9</sub> | 87.63                | 537.2119               | 537.2101                | -1.769    | 415.1752; 437.1569; 371.1491; 340.1305; 537.2095                                          | +H   |
| 61          | Schisantherin D             | C <sub>29</sub> H <sub>30</sub> O <sub>9</sub> | 88.56                | 521.1806               | 521.1799                | -0.619    | 184.0735; 104.1070; 86.0964; 124.9999                                                     | +H   |
| 62          | Shancigusin B               | C <sub>28</sub> H <sub>26</sub> O <sub>5</sub> | 89.43                | 443.1853               | 443.1833                | -1.98     | N/A                                                                                       | +H   |
| 63          | Schizandrol B               | C <sub>28</sub> H <sub>34</sub> O <sub>9</sub> | 90.81                | 512.2275               | 512.2283                | 0.831     | 385.1648; 355.1539; 316.0943; 323.1275; 354.1459; 312.0992; 417.2274; 316.1305; 301.1070; | +H   |
| 64          | Schizandrin A               | C <sub>24</sub> H <sub>32</sub> O <sub>6</sub> | 94.57                | 417.2271               | 417.2274                | 0.315     | 347.1489; 285.1119; 418.2304; 402.2042; 242.0937                                          | +H   |
| 65          | Schisanlactone B            | C <sub>30</sub> H <sub>42</sub> O <sub>4</sub> | 95.33                | 467.3155               | 467.3162                | 0.634     | 95.0855; 449.3051; 431.2940; 1007.0855; 145.1011                                          | +H   |
| 66          | Schisandrin C               | C <sub>22</sub> H <sub>24</sub> O <sub>6</sub> | 98.63                | 385.1645               | 385.1650                | 0.445     | 385.1645; 355.1542; 285.0757; 277.0702                                                    | +H   |

| Peak Number | Identification Component | Molecular Formula                                            | Retention Time (min) | Theoretical Mass (m/z) | Experimental Mass (m/z) | Delta mmu | Main MS/MS Fragments Detected                               | Mode |
|-------------|--------------------------|--------------------------------------------------------------|----------------------|------------------------|-------------------------|-----------|-------------------------------------------------------------|------|
| 67          | Schisandrin B            | C <sub>23</sub> H <sub>28</sub> O <sub>6</sub>               | 99.44                | 401.1958               | 401.1855                | -10.285   | 401.1961; 402.1996;<br>386.1726387.1781                     | +H   |
| 68          | Schisanlactone D         | C <sub>30</sub> H <sub>44</sub> O <sub>3</sub>               | 102.73               | 453.3363               | 453.3363                | -0.022    | N/A                                                         | +H   |
| Other Type  |                          |                                                              |                      |                        |                         |           |                                                             |      |
| 68          | L-Arginine               | C <sub>6</sub> H <sub>14</sub> O <sub>2</sub> N <sub>4</sub> | 2.30                 | 175.1189               | 175.1192                | 0.278     | 70.0652; 60.0559; 116.0706; 175.1192;<br>130.0976; 158.0926 | +H   |
| 69          | Betaine                  | C <sub>5</sub> H <sub>11</sub> NO <sub>2</sub>               | 2.49                 | 118.0862               | 118.0863                | 0.075     | 118.0863                                                    | +H   |
| 70          | Sucrose                  | C <sub>12</sub> H <sub>22</sub> O <sub>11</sub>              | 2.51                 | 341.1078               | 341.1089                | 1.082     | 341.1098; 161.0545                                          | -H   |
| 71          | Quinic acid              | C <sub>7</sub> H <sub>12</sub> O <sub>6</sub>                | 2.57                 | 191.0550               | 191.0562                | 1.215     | N/A                                                         | -H   |
| 72          | Stachydrine              | C <sub>7</sub> H <sub>13</sub> NO <sub>2</sub>               | 2.62                 | 144.1004               | 144.1021                | 0.205     | 144.1019; 58.0654; 84.0807; 145.1054;<br>102.2848           | +H   |
| 73          | Adenine                  | C <sub>5</sub> H <sub>5</sub> N <sub>5</sub>                 | 2.71                 | 136.0617               | 136.062                 | 0.238     | 136.0217                                                    | +H   |
| 74          | Shikimic acid            | C <sub>7</sub> H <sub>10</sub> O <sub>5</sub>                | 2.76                 | 173.04444              | 173.0454                | 1.040     | 173.0457; 155.0350                                          | -H   |

| Peak Number | Identification Component | Molecular Formula                                             | Retention Time (min) | Theoretical Mass (m/z) | Experimental Mass (m/z) | Delta mmu | Main MS/MS Fragments Detected                    | Mode |
|-------------|--------------------------|---------------------------------------------------------------|----------------------|------------------------|-------------------------|-----------|--------------------------------------------------|------|
| 75          | p-Hydroxybenzoic acid    | C <sub>7</sub> H <sub>6</sub> O <sub>3</sub>                  | 2.76                 | 137.0233               | 137.0243                | 1.029     | N/A                                              | -H   |
| 76          | Niacin                   | C <sub>6</sub> H <sub>5</sub> NO <sub>2</sub>                 | 3.39                 | 124.0393               | 124.0394                | 0.155     | N/A                                              | +H   |
| 77          | 6-Demethoxytangeretin    | C <sub>6</sub> H <sub>8</sub> O <sub>7</sub>                  | 3.43                 | 191.0186               | 191.0199                | 1.281     | N/A                                              | -H   |
| 78          | Citric acid              | C <sub>6</sub> H <sub>8</sub> O <sub>7</sub>                  | 3.47                 | 191.0186               | 191.0198                | -0.156    | 111.0087; 191.0561; 179.0091                     | -H   |
| 79          | Catechin                 | C <sub>15</sub> H <sub>14</sub> O <sub>6</sub>                | 3.57                 | 289.0706               | 289.0678                | -2.825    | 290.0885; 128.0353; 133.0143; 115.0036; 200.0564 | -H   |
| 80          | Adenosine                | C <sub>10</sub> H <sub>13</sub> N <sub>5</sub> O <sub>4</sub> | 3.68                 | 268.104                | 268.1042                | 0.19      | 136.0619; 268.1055                               | +H   |
| 81          | Gastrodin                | C <sub>13</sub> H <sub>18</sub> O <sub>8</sub>                | 5.25                 | 285.0968               | 285.0981                | 1.261     | 123.0451; 124.0484; 99.9258; 95.0502             | -H   |
| 82          | D (-)-Salicin            | C <sub>13</sub> H <sub>18</sub> O <sub>7</sub>                | 5.25                 | 285.0968               | 285.0980                | 1.201     | 283.8006; 195.0417                               | -H   |
| 83          | Vanillic acid            | C <sub>8</sub> H <sub>8</sub> O <sub>4</sub>                  | 10.11                | 167.0338               | 167.0349                | 1.105     | 166.9933                                         | -H   |
| 84          | Protocatechuic acid      | C <sub>7</sub> H <sub>6</sub> O <sub>4</sub>                  | 10.37                | 153.0182               | 153.0193                | 1.095     | N/A                                              | -H   |

| Peak Number | Identification Component                           | Molecular Formula                               | Retention Time (min) | Theoretical Mass (m/z) | Experimental Mass (m/z) | Delta mmu | Main MS/MS Fragments Detected                 | Mode |
|-------------|----------------------------------------------------|-------------------------------------------------|----------------------|------------------------|-------------------------|-----------|-----------------------------------------------|------|
| 85          | Parishin E                                         | C <sub>19</sub> H <sub>24</sub> O <sub>13</sub> | 12.81                | 459.1133               | 459.1145                | 1.183     | 111.0087; 112.0121; 67.0789                   | -H   |
| 86          | 4-Hydroxybenzoic acid                              | C <sub>7</sub> H <sub>6</sub> O <sub>3</sub>    | 14.05                | 137.0233               | 137.0244                | 1.109     | N/A                                           | -H   |
| 87          | Chlorogenic acid                                   | C <sub>16</sub> H <sub>18</sub> O <sub>9</sub>  | 16.11                | 355.1023               | 355.1026                | 0.331     | N/A                                           | +H   |
| 88          | Caffeic acid                                       | C <sub>9</sub> H <sub>8</sub> O <sub>4</sub>    | 18.42                | 179.0338               | 179.0347                | 0.885     | N/A                                           | -H   |
| 89          | Bletlos B                                          | C <sub>27</sub> H <sub>26</sub> O <sub>7</sub>  | 19.03                | 463.1751               | 463.1711                | 1.884     | 463.3031; 127.0367; 377.1919                  | +H   |
| 90          | L-Phenylalanine                                    | C <sub>9</sub> H <sub>11</sub> NO <sub>2</sub>  | 19.14                | 166.0862               | 166.0874                | 1.145     | N/A                                           | -H   |
| 91          | Ferulic acid                                       | C <sub>10</sub> H <sub>10</sub> O <sub>4</sub>  | 30.10                | 193.0495               | 193.0506                | 1.105     | 134.0374; 178.0273; 137.0244                  | -H   |
| 92          | 1-(p-Hydroxybenzyl)-4,7-dimethoxyphenanthrene-2-ol | C <sub>23</sub> H <sub>20</sub> O <sub>4</sub>  | 33.58                | 359.1277               | 359.1256                | -2.116    | 99.9259; 203.8657; 70.9377; 199.8516; 97.9312 | -H   |
| 93          | Deacetylnomilinic acid                             | C <sub>26</sub> H <sub>34</sub> O <sub>9</sub>  | 37.61                | 491.2275               | 491.2291                | 1.631     | N/A                                           | +H   |

| Peak Number | Identification Component                                         | Molecular Formula                               | Retention Time (min) | Theoretical Mass (m/z) | Experimental Mass (m/z) | Delta mmu | Main MS/MS Fragments Detected                             | Mode |
|-------------|------------------------------------------------------------------|-------------------------------------------------|----------------------|------------------------|-------------------------|-----------|-----------------------------------------------------------|------|
| 94          | Dactylorhin A                                                    | C <sub>40</sub> H <sub>56</sub> O <sub>22</sub> | 41.31                | 887.3179               | 887.3199                | 2.001     | 153.0557; 439.1611; 171.0662; 127.0765                    | -H   |
| 95          | Emodin                                                           | C <sub>15</sub> H <sub>10</sub> O <sub>5</sub>  | 41.41                | 269.0444               | 269.0457                | 1.300     | 269.2121; 251.2031; 246.4756                              | -H   |
| 96          | Gymnoside II                                                     | C <sub>21</sub> H <sub>30</sub> O <sub>11</sub> | 42.29                | 457.1704               | 457.1719                | 1.472     | 123.0451; 129.0558; 99.0815; 1217.0764                    | -H   |
| 97          | Blestrin C                                                       | C <sub>30</sub> H <sub>24</sub> O <sub>6</sub>  | 42.31                | 481.1645               | 481.1691                | 4.595     | 487.1440; 415.2113; 384.1931                              | +H   |
| 98          | Militarine                                                       | C <sub>34</sub> H <sub>46</sub> O <sub>17</sub> | 49.74                | 725.2651               | 725.266                 | 1.474     | 123.0451; 127.0764; 129.0557; 99.0815; 153.0557; 457.1719 | -H   |
| 99          | 3,3'-Dihydroxy-5-methoxy-2,5',6-tris (p -hydroxybenzyl) bibenzyl | C <sub>46</sub> H <sub>44</sub> O <sub>11</sub> | 49.80                | 771.2799               | 771.272                 | 1.485     | 123.0451; 127.0764; 153.0559; 129.0558; 99.0813; 171.0658 | -H   |

| Peak Number | Identification Component                                       | Molecular Formula                              | Retention Time (min) | Theoretical Mass (m/z) | Experimental Mass (m/z) | Delta mmu | Main MS/MS Fragments Detected                   | Mode |
|-------------|----------------------------------------------------------------|------------------------------------------------|----------------------|------------------------|-------------------------|-----------|-------------------------------------------------|------|
| 100         | 3,7-Dihydroxy-2,4-dimethoxyphenanthrene-3- <i>O</i> -glucoside | C <sub>22</sub> H <sub>24</sub> O <sub>9</sub> | 50.17                | 431.1337               | 431.1349                | 1.261     | 347.2438; 329.2327; 201.1131                    | -H   |
| 101         | 2,7-Dihydroxy-4-methoxyphenanthrene-2- <i>O</i> -glucoside     | C <sub>21</sub> H <sub>22</sub> O <sub>8</sub> | 50.27                | 401.1231               | 401.1249                | 1.816     | 158.9614; 128.9506; 99.0804; 130.9664; 113.9636 | -H   |
| 102         | 3,7-Dihydroxy-2,4,8-trimethoxyphenanthrene                     | C <sub>17</sub> H <sub>16</sub> O <sub>5</sub> | 50.83                | 299.0914               | 299.0924                | 1.07      | 299.2588; 281.2478; 253.2532                    | -H   |
| 103         | 3'-Hydroxy-5-methoxybibenzyl-3- <i>O</i> -β-D-glucopyranoside  | C <sub>21</sub> H <sub>26</sub> O <sub>8</sub> | 51.59                | 405.1543               | 405.1558                | 1.426     | 243.1027; 227.0712; 99.9257                     | -H   |

| Peak Number | Identification Component                                                   | Molecular Formula                                             | Retention Time (min) | Theoretical Mass (m/z) | Experimental Mass (m/z) | Delta mmu | Main MS/MS Fragments Detected                    | Mode |
|-------------|----------------------------------------------------------------------------|---------------------------------------------------------------|----------------------|------------------------|-------------------------|-----------|--------------------------------------------------|------|
| 104         | 2,7-Dihydroxy-1-(4'-hydroxybenzyl)-9,10-dihydrophenanthrene-4'-O-glucoside | C <sub>28</sub> H <sub>30</sub> O <sub>9</sub>                | 51.75                | 509.1806               | 509.1823                | 1.731     | 352.8634; 306.7932; 205.8609; 172.8633; 99.9257  | -H   |
| 105         | 2,7-Dihydroxy-4-methoxyphenanthrene-2,7-O-diglucoside                      | C <sub>27</sub> H <sub>32</sub> O <sub>13</sub>               | 51.82                | 563.1759               | 563.1768                | 0.843     | 502.2883; 347.1708; 277.2174                     | -H   |
| 106         | Isomucronulatol 7-O-glucoside                                              | C <sub>23</sub> H <sub>28</sub> O <sub>10</sub>               | 52.61                | 461.1598               | 461.1614                | 1.567     | 461.2889; 447.5608; 417.2987; 373.3093           | -H   |
| 107         | 2,7-Dihydroxy-3,4-dimethoxyphenanthrene                                    | C <sub>16</sub> H <sub>14</sub> O <sub>4</sub>                | 55.44                | 269.0808               | 268.0823                | 1.535     | 252.0428; 267.0663; 223.0400; 253.0464; 251.0353 | -H   |
| 108         | Citrusin III                                                               | C <sub>36</sub> H <sub>53</sub> N <sub>7</sub> O <sub>9</sub> | 57.27                | 728.3977               | 728.3982                | 0.497     | 662.6917; 419.1340; 389.0870                     | +H   |

| Peak Number | Identification Component                                       | Molecular Formula                                             | Retention Time (min) | Theoretical Mass (m/z) | Experimental Mass (m/z) | Delta mmu | Main MS/MS Fragments Detected                              | Mode |
|-------------|----------------------------------------------------------------|---------------------------------------------------------------|----------------------|------------------------|-------------------------|-----------|------------------------------------------------------------|------|
| 109         | 2,3,4,7-Tetramethoxyphenanthrene                               | C <sub>18</sub> H <sub>18</sub> O <sub>4</sub>                | 57.85                | 291.1121               | 291.1134                | 1.224     | 291.1608; 250.4938; 141.1286; 121.0294                     | -H   |
| 110         | Sitosterol                                                     | C <sub>19</sub> H <sub>50</sub> O                             | 57.99                | 415.3934               | 415.3903                | -3.093    | 415.21167                                                  | +H   |
| 111         | Blestritin C                                                   | C <sub>36</sub> H <sub>34</sub> O <sub>6</sub>                | 58.55                | 563.2428               | 563.241                 | -1.785    | 450.3754; 437.1567; 415.1748                               | +H   |
| 112         | 2,7-Dihydroxy-1-(p-hydroxybenzoyl)-4-methoxy-9,10-dihydrophene | C <sub>22</sub> H <sub>18</sub> O <sub>5</sub>                | 61.04                | 361.107                | 361.1083                | 1.29      | 277.1439; 202.9209                                         | -H   |
| 113         | Gymnoside V                                                    | C <sub>49</sub> H <sub>62</sub> O <sub>23</sub>               | 62.19                | 1017.3598              | 1017.362                | 1.696     | N/A                                                        | -H   |
| 114         | Citrusin I                                                     | C <sub>34</sub> H <sub>53</sub> N <sub>7</sub> O <sub>9</sub> | 63.35                | 702.3821               | 702.3837                | 1.627     | 614.3314; 102.9487; 146.9385; 427.2670; 183.0886; 203.0829 | -H   |
| 115         | Batatasin III                                                  | C <sub>15</sub> H <sub>16</sub> O <sub>3</sub>                | 65.26                | 245.1172               | 245.1173                | 0.169     | 226.8936; 208.8830; 180.8881                               | +H   |
| 116         | Astragaloside I                                                | C <sub>41</sub> H <sub>68</sub> O <sub>14</sub>               | 65.27                | 783.4525               | 783.453                 | 0.467     | 457.6901; 227.1154                                         | -H   |
| 117         | Astragaloside IV                                               | C <sub>41</sub> H <sub>68</sub> O <sub>14</sub>               | 68.85                | 785.4681               | 785.5526                | -3.54     | 455.0798                                                   | +H   |



| Peak Number | Identification Component                                      | Molecular Formula                              | Retention Time (min) | Theoretical Mass (m/z) | Experimental Mass (m/z) | Delta mmu | Main MS/MS Fragments Detected                    | Mode |
|-------------|---------------------------------------------------------------|------------------------------------------------|----------------------|------------------------|-------------------------|-----------|--------------------------------------------------|------|
| 118         | 3-(4-Hydroxybenzyl)-4-methoxy-2,7-dihydroxy-9,10-dihydrophene | C <sub>22</sub> H <sub>20</sub> O <sub>4</sub> | 66.08                | 349.1434               | 349.1393                | -4.096    | 259.2458; 231.2146                               | +H   |
| 119         | 4,7-Dihydroxy-1-(p-hydroxybenzyl)-2-methoxy-9,10-dihydrophene | C <sub>22</sub> H <sub>20</sub> O <sub>4</sub> | 66.13                | 347.1278               | 347.129                 | 1.214     | 332.1052; 347.1290; 331.0981; 99.9257            | -H   |
| 120         | Lusianthridin                                                 | C <sub>15</sub> H <sub>14</sub> O <sub>3</sub> | 66.18                | 243.1016               | 243.101                 | -0.571    | 242.2842; 243.2877; 208.8836; 158.1905; 57.0702  | +H   |
| 121         | Propindilactone G                                             | C <sub>29</sub> H <sub>38</sub> O <sub>8</sub> | 66.74                | 515.2639               | 515.2634                | -0.515    | 515.2279; 469.2212; 385.1648; 355.1539           | +H   |
| 122         | 1-(4-Hydroxybenzyl)-4-methoxy-2,7-dihydroxyphenanthrene       | C <sub>22</sub> H <sub>18</sub> O <sub>4</sub> | 67.02                | 345.1121               | 345.1134                | 3.751     | 345.1133; 330.0897; 302.0954; 237.0557; 99.92577 | -H   |

| Peak Number | Identification Component                               | Molecular Formula                              | Retention Time (min) | Theoretical Mass (m/z) | Experimental Mass (m/z) | Delta mmu | Main MS/MS Fragments Detected                              | Mode |
|-------------|--------------------------------------------------------|------------------------------------------------|----------------------|------------------------|-------------------------|-----------|------------------------------------------------------------|------|
| 123         | 1-(p-Hydroxybenzyl)-4,8-dimethoxyphenanthrene-2,7-diol | C <sub>23</sub> H <sub>20</sub> O <sub>5</sub> | 68.15                | 375.1227               | 375.124                 | 1.380     | 317.0817; 360.1003; 345.0771; 361.1044; 318.0864; 346.0802 | -H   |
| 124         | Blestrin B                                             | C <sub>30</sub> H <sub>26</sub> O <sub>6</sub> | 68.50                | 483.185                | 483.1793                | -0.865    | 483.2380; 83.0491; 55.0546;                                | +H   |
| 125         | Blestriarene A                                         | C <sub>30</sub> H <sub>26</sub> O <sub>6</sub> | 68.55                | 481.1645               | 481.1659                | 1.425     | 481.1664; 146.9388; 102.9487; 465.1347; 99.9258            | -H   |
| 126         | Limonin                                                | C <sub>26</sub> H <sub>30</sub> O <sub>8</sub> | 68.78                | 469.1856               | 469.1868                | 1.166     | 367.7307; 309.3000; 179.0564; 111.0087                     | -H   |
| 127         | 3,3'-Dihydroxy-4-(p-hydroxybenzyl)-5-methoxy-bibenzyl  | C <sub>22</sub> H <sub>22</sub> O <sub>4</sub> | 68.88                | 349.1434               | 349.1447                | 1.274     | 243.1023; 227.0714; 93.0345; 99.9257; 103.9201             | -H   |
| 128         | 3'-O-Methylbatatasin III                               | C <sub>15</sub> H <sub>18</sub> O <sub>3</sub> | 68.90                | 245.1172               | 245.1175                | 0.299     | 226.8936; 208.8831; 180.8882; 224.9272; 197.8909           | +H   |

| Peak Number | Identification Component                                            | Molecular Formula                               | Retention Time (min) | Theoretical Mass (m/z) | Experimental Mass (m/z) | Delta mmu | Main MS/MS Fragments Detected                             | Mode |
|-------------|---------------------------------------------------------------------|-------------------------------------------------|----------------------|------------------------|-------------------------|-----------|-----------------------------------------------------------|------|
| 129         | Blestrin D                                                          | C <sub>30</sub> H <sub>24</sub> O <sub>6</sub>  | 69.31                | 479.1489               | 479.1503                | 1.415     | 415.2114; 384.1926; 369.1684                              | -H   |
| 130         | Nomilinic acid                                                      | C <sub>28</sub> H <sub>36</sub> O <sub>10</sub> | 69.38                | 531.2224               | 531.2239                | 1.466     | 59.0138; 99.9259; 60.0170; 325.1830; 414.7184             | -H   |
| 131         | Blestriarene A                                                      | C <sub>30</sub> H <sub>22</sub> O <sub>6</sub>  | 69.84                | 477.1332               | 477.135                 | 1.805     | 293.1260; 107.0492                                        | -H   |
| 132         | Blestritin B                                                        | C <sub>30</sub> H <sub>30</sub> O <sub>6</sub>  | 70.37                | 485.1958               | 485.1958                | 0.025     | 146.9386; 123.0452; 102.9487; 99.0815; 127.0765; 129.0559 | -H   |
| 133         | 3,3'-Dihydroxy-2,6-bis(p-hydroxybenzyl)-5-methoxy-bibenzyl          | C <sub>29</sub> H <sub>28</sub> O <sub>5</sub>  | 70.74                | 455.1853               | 455.1868                | 1.59      | 361.1445; 346.1203; 331.0978; 304.1097; 255.1027          | -H   |
| 134         | 5,6,7,3',4',5'-Hexamethoxyflavone                                   | C <sub>21</sub> H <sub>22</sub> O <sub>8</sub>  | 70.85                | 403.1387               | 403.1391                | 0.356     | 403.1388; 373.0918; 355.0806                              | +H   |
| 135         | 2,7-Dihydroxy-1,3-di(p-hydroxybenzyl) -4-methoxy-9, 10-dihydrophene | C <sub>29</sub> H <sub>26</sub> O <sub>5</sub>  | 70.94                | 453.1696               | 453.1711                | 1.46      | 68.8936; 290.5523; 388.8314; 359.5929; 95.9958; 179.4764  | -H   |

| Peak Number | Identification Component                                                                                             | Molecular Formula                              | Retention Time (min) | Theoretical Mass (m/z) | Experimental Mass (m/z) | Delta mmu | Main MS/MS Fragments Detected         | Mode |
|-------------|----------------------------------------------------------------------------------------------------------------------|------------------------------------------------|----------------------|------------------------|-------------------------|-----------|---------------------------------------|------|
| 136         | Bleformin D                                                                                                          | C <sub>37</sub> H <sub>32</sub> O <sub>7</sub> | 71.57                | 587.2064               | 587.2088                | 2.43      | N/A                                   | -H   |
| 137         | 3,3'-Dihydroxy-2-(p-hydroxybenzyl)-5-methoxy-bibenzyl                                                                | C <sub>22</sub> H <sub>22</sub> O <sub>4</sub> | 72.09                | 351.159                | 351.1591                | 0.064     | N/A                                   | +H   |
| 138         | 2,7-Dihydroxy-1-(p-hydroxybenzoyl)-4-methoxy-9, 10-dihydrophene                                                      | C <sub>22</sub> H <sub>18</sub> O <sub>5</sub> | 72.25                | 363.1227               | 363.1235                | 0.8       | N/A                                   | +H   |
| 139         | (2,3-trans)-2-(4-hydroxy-3-methoxyphenyl)-3-hydroxymethyl-10-methoxy-2,3,4,5-tetrahydro-phenanthro[2,1-b] furan-7-ol | C <sub>25</sub> H <sub>24</sub> O <sub>6</sub> | 72.84                | 419.1489               | 419.1504                | 1.565     | 293.2123; 235.1705; 275.2013; 95.0137 | -H   |

| Peak Number | Identification Component                                             | Molecular Formula                              | Retention Time (min) | Theoretical Mass (m/z) | Experimental Mass (m/z) | Delta mmu | Main MS/MS Fragments Detected                  | Mode |
|-------------|----------------------------------------------------------------------|------------------------------------------------|----------------------|------------------------|-------------------------|-----------|------------------------------------------------|------|
| 140         | 3-Hydroxy-5,6,7,8,3',4'-hexamethoxyflavone                           | C <sub>21</sub> H <sub>22</sub> O <sub>9</sub> | 74.36                | 419.1336               | 419.1339                | 0.281     | N/A                                            | +H   |
| 141         | Blestritin A                                                         | C <sub>37</sub> H <sub>36</sub> O <sub>6</sub> | 74.66                | 577.2584               | 577.2602                | 1.785     | N/A                                            | +H   |
| 142         | 2,6-Bis(4-hydroxybenzyl)-3',5-dimethoxy-3-hydroxyl bibenzyl          | C <sub>30</sub> H <sub>30</sub> O <sub>5</sub> | 79.02                | 469.2009               | 469.2021                | 1.17      | 469.3320; 470.3356; 451.3221; 468.3203         | -H   |
| 143         | Pregomisin                                                           | C <sub>22</sub> H <sub>30</sub> O <sub>6</sub> | 79.51                | 391.2115               | 391.2118                | 0.365     | 391.2117,167.0704,205.1225; 237.1486; 359.1845 | +H   |
| 144         | 4,7,3'5'-Tetramethoxy-9',10'-dihydro-[1,2'-biphenanthrene]-2,7'-diol | C <sub>32</sub> H <sub>27</sub> O <sub>6</sub> | 79.56                | 506.1723               | 506.1701                | -2.29     | N/A                                            | -H   |
| 145         | Bleochranol D                                                        | C <sub>34</sub> H <sub>32</sub> O <sub>8</sub> | 83.53                | 569.2169               | 569.2152                | -1.724    | 431.2065; 387.1803; 356.1612; 68.8067          | +H   |

| Peak Number | Identification Component                                          | Molecular Formula                              | Retention Time (min) | Theoretical Mass (m/z) | Experimental Mass (m/z) | Delta mmu | Main MS/MS Fragments Detected                                       | Mode |
|-------------|-------------------------------------------------------------------|------------------------------------------------|----------------------|------------------------|-------------------------|-----------|---------------------------------------------------------------------|------|
| 146         | Benzoylgomisin Q                                                  | C <sub>31</sub> H <sub>36</sub> O <sub>9</sub> | 83.63                | 553.2432               | 553.2415                | -1.629    | 553.2048; 507.1993; 508.2027; 423.1411; 391.1147                    | +H   |
| 147         | Kadsuphilactone B                                                 | C <sub>30</sub> H <sub>42</sub> O <sub>5</sub> | 84.35                | 483.3105               | 483.3106                | 0.169     | 483.2379; 427.1748; 414.1678; 395.1487; 451.2117                    | +H   |
| 148         | 2',6'-Bis(p-hydroxybenzyl)-5-methoxybibenzyl-3,3'-diol            | C <sub>33</sub> H <sub>36</sub> O <sub>5</sub> | 89.13                | 511.2479               | 511.2721                | -2.773    | 103.9202; 104.9279; 71.0138; 184.9544; 158.9386; 114.9487; 187.0062 | -H   |
| 149         | Linolic acid                                                      | C <sub>16</sub> H <sub>22</sub> O <sub>4</sub> | 92.63                | 277.1434               | 277.1446                | 1.214     | 277.1446; 121.0294                                                  | -H   |
| 150         | 2,7-Dihydroxy-1,3-di(p-hydroxybenzyl)-4-methoxy-9,10-dihydrophene | C <sub>29</sub> H <sub>26</sub> O <sub>5</sub> | 94.60                | 455.1853               | 455.1832                | -2.04     | N/A                                                                 | +H   |
| 151         | Bleochranol A                                                     | C <sub>40</sub> H <sub>38</sub> O <sub>8</sub> | 97.72                | 645.2482               | 645.2487                | -2.565    | 293.2123; 235.1705; 275.2013; 95.0137                               | -H   |
| 152         | Mexicanolide                                                      | C <sub>27</sub> H <sub>32</sub> O <sub>7</sub> | 99.65                | 469.2220               | 469.2221                | 0.03      | 83.0491; 55.0546; 283.1749; 133.0858                                | +H   |

| Peak Number | Identification Component                  | Molecular Formula                              | Retention Time (min) | Theoretical Mass (m/z) | Experimental Mass (m/z) | Delta mmu | Main MS/MS Fragments Detected                       | Mode |
|-------------|-------------------------------------------|------------------------------------------------|----------------------|------------------------|-------------------------|-----------|-----------------------------------------------------|------|
| 153         | $\alpha$ -Linolenic acid                  | C <sub>18</sub> H <sub>30</sub> O <sub>2</sub> | 101.03               | 277.2162               | 277.2172                | 1.083     | 121.0295; 277.2173                                  | -H   |
| 154         | dancosterol                               | C <sub>35</sub> H <sub>60</sub> O <sub>6</sub> | 104.64               | 577.4462               | 577.4370                | -2.536    | N/A                                                 | +H   |
| 155         | arundinan                                 | C <sub>22</sub> H <sub>22</sub> O <sub>3</sub> | 104.94               | 335.1641               | 335.1662                | 2.119     | N/A                                                 | +H   |
| 156         | 18 $\beta$ -Glycyrrhetinic Acid           | C <sub>30</sub> H <sub>46</sub> O <sub>4</sub> | 105.81               | 469.3312               | 469.3324                | 1.164     | 425.3426; 469.3329; 426.3468;<br>451.3211; 116.9284 | -H   |
| 157         | Glabrolide                                | C <sub>30</sub> H <sub>44</sub> O <sub>4</sub> | 107.19               | 467.3155               | 467.317                 | 1.434     | 423.3270; 467.3163; 424.3318;<br>449.3076; 468.3195 | -H   |
| 158         | Palmitic acid                             | C <sub>16</sub> H <sub>32</sub> O <sub>2</sub> | 108.73               | 255.2318               | 255.2329                | 1.133     | 255.2330; 74.0248; 116.9286                         | -H   |
| 159         | 2,4,7-Trimethoxy-9,10-dihydrophenanthrene | C <sub>17</sub> H <sub>18</sub> O <sub>3</sub> | 110.50               | 269.1172               | 269.2115                | 0.399     | N/A                                                 | -H   |
| 160         | Oleanonic acid                            | C <sub>30</sub> H <sub>46</sub> O <sub>3</sub> | 112.30               | 453.3363               | 453.3375                | 1.228     | 453.3374; 454.3390; 94.9806                         | -H   |

\*N/A denotes the meaning of the component cannot find the secondary fragment in ion spectrum.

**Table S11.** Regression model performance of training data and validation data.

|                                  |                                    | BPNN     |            | RBFNN    |            |
|----------------------------------|------------------------------------|----------|------------|----------|------------|
|                                  |                                    | Training | Validation | Training | Validation |
|                                  |                                    | data     | data       | data     | data       |
| Ethanol<br>Extraction<br>Process | Yield of Dry<br>Extraction         | 0.9996   | 0.9999     | 0.9964   | 0.9987     |
|                                  | Extraction Yield of<br>Schisandrin | 0.9966   | 0.9901     | 0.9977   | 0.9986     |
| Water Extraction<br>Process      | Yield of Dry<br>Extraction         | 0.9955   | 0.9895     | 0.9947   | 0.9949     |
|                                  | Content of Total<br>Sugar          | 0.9984   | 0.9985     | 0.9948   | 0.9694     |
|                                  | Content of<br>Hesperidin           | 0.9971   | 0.9997     | 0.9969   | 0.9041     |
|                                  | $W_{ave}$                          | 0.8771   | 0.8955     | 0.9764   | 0.9631     |
|                                  | $\overline{A_{ave}}$               | 0.9647   | 0.9839     | 0.9708   | 0.9720     |
|                                  | $\overline{MW_{ave}}$              | 0.9647   | 0.9742     | 0.9636   | 0.9592     |



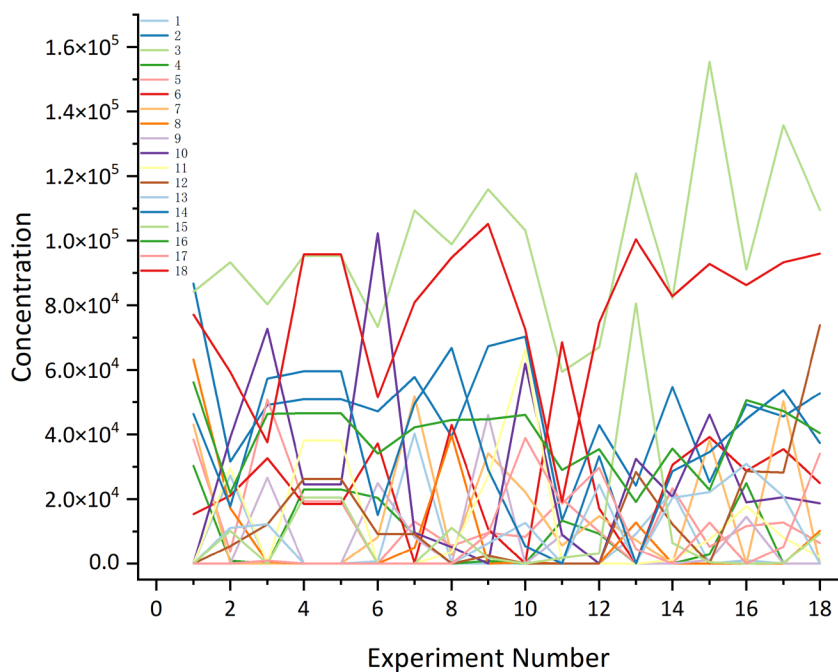

**Fig. S5.** Concentrations of OED samples calculated by MCR-ALS.

---

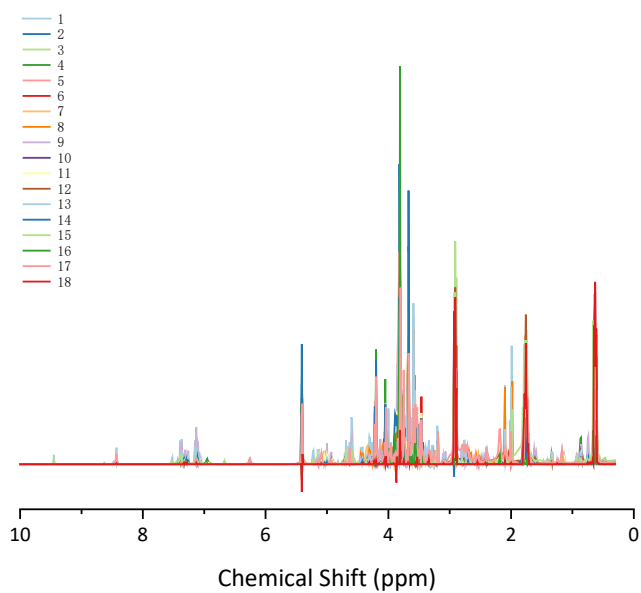

**Fig. S6.** qNMR spectrum of OED samples deconvoluted by MCR-ALS. by MCR-ALS.

---

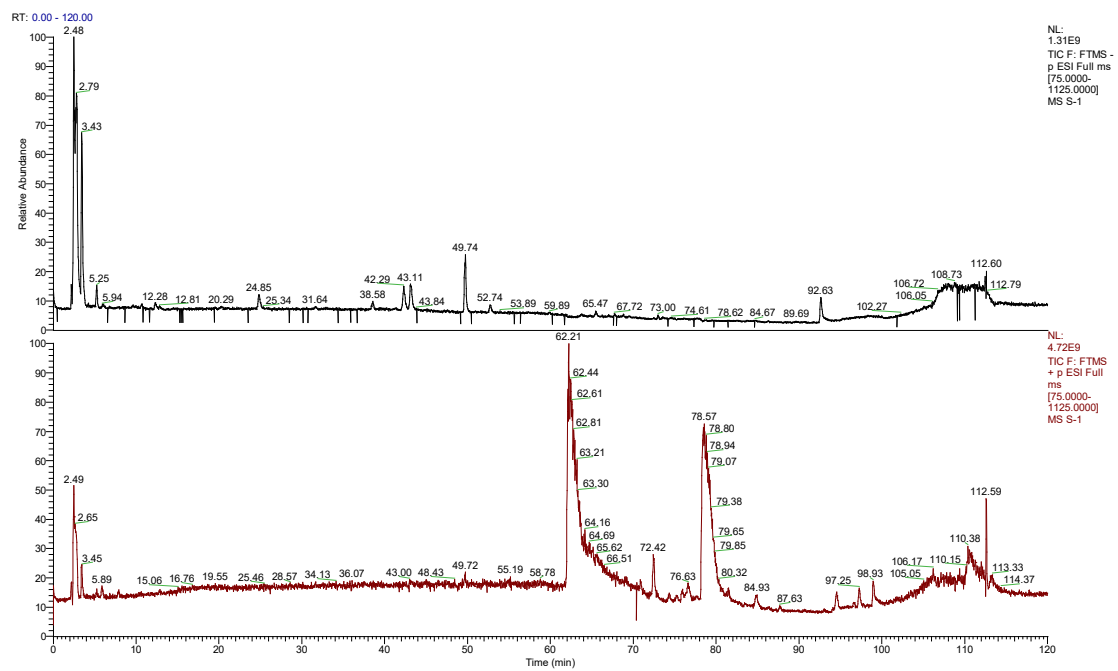

**Fig. S7.** Total ion chromatogram of ideal extract of BWG on positive and negative mode.

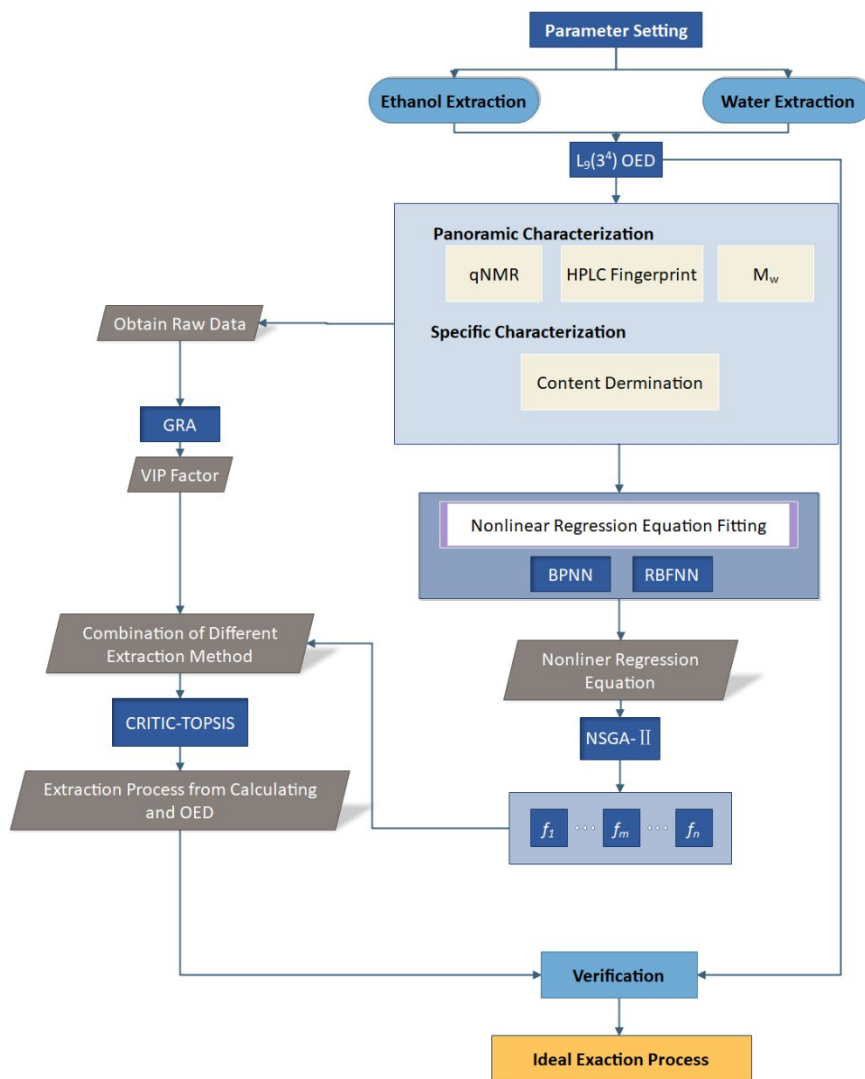

**Fig. S8.** The workflow of the model to optimize the multiple stage extraction process.

#### 4. References

- 1 T. Yamazaki, S. Nakamura and T. Saito, *Metrologia*, 2017, **54**, 224–228.
- 2 S. Westwood, T. Yamazaki, T. Huang, B. Garrido, I. Ün, W. Zhang, G. Martos, N. Stoppacher, T. Saito and R. Wielgosz, *Metrologia*, 2019, **56**, 064001.
- 3 T.-Q. Peng, X.-L. Yin, H.-W. Gu, W. Sun, B. Ding, X.-C. Hu, L.-A. Ma, S.-D. Wei, Z. Liu and S.-Y. Ye, *Food Chemistry*, 2021, **347**, 128959.
- 4 D. J. Strydom, *Journal of Chromatography A*, 1994, **678**, 17–23.
- 5 X. Li, X. Wang, Y. Dong, R. Song, J. Wei, A. Yu, Q. Fan, J. Yao, D. Shan, F. Lv, X. Zhong and G. She, *Industrial Crops and Products*, 2022, **175**, 114288.
- 6 S. K. Bharti and R. Roy, *TrAC Trends in Analytical Chemistry*, 2012, **35**, 5–26.
- 7 S. Zhou, G. Huang and G. Chen, *FOOD CHEMISTRY*, , DOI:10.1016/j.foodchem.2021.130089.
- 8 C. Peng, Y. Zhu, F. Yan, Y. Su, Y. Zhu, Z. Zhang, C. Zuo, H. Wu, Y. Zhang, J. Kan and D. Peng, *Food Chemistry*, 2021, **340**, 127907.
- 9 L. Zhu, G. Wang, F. Huang, Y. Li, W. Chen and H. Hong, *IEEE Geosci. Remote Sensing Lett.*, 2022, **19**, 1–5.
- 10 N. Liu, W. Yang, X. Li, P. Zhao, Y. Liu, L. Guo, L. Huang and W. Gao, *FOOD CHEMISTRY*, , DOI:10.1016/j.foodchem.2022.132683.
- 11 M. Yu, *Carbohydrate Polymers*, 2021, **9**.
- 12 F. Dranca, M. Vargas and M. Oroian, *Food Hydrocolloids*, 2020, **100**, 105383.
- 13 X. Chen, G. Chen, Z. Wang and J. Kan, *International Journal of Biological Macromolecules*, 2020, **151**, 635–649.
- 14 X. Li, L. Wang, Y. Wang and Z. Xiong, *PROCESS BIOCHEMISTRY*, 2016, **51**, 1100–1108.
